1 **Metabolomics of lung microdissections reveals region- and sex-specific metabolic effects of acute naphthalene**  
2 **exposure in mice**

3  
4 Nathaniel C. Stevens<sup>1</sup>, Patricia C. Edwards<sup>2</sup>, Lisa M. Tran<sup>3</sup>, Xinxin Ding<sup>3</sup>, Laura S. Van Winkle<sup>2</sup> and Oliver Fiehn<sup>1</sup>

5  
6 <sup>1</sup>Genome Center, University of California Davis, Davis, California, <sup>2</sup>Center for Health and the Environment, University of  
7 California Davis, Davis, California, <sup>3</sup>Department of Pharmacology and Toxicology, College of Pharmacy, University of  
8 Arizona, Tucson, Arizona

9  
10 Author Contributions: N.C.S., L.V.W., and O.F. prepared the manuscript; N.C.S., L.V.W., and P.C.E. developed the  
11 experimental design for the study; L.V.W. and X.D. provided animals for the study; N.C.S., L.M.T., and P.C.E. performed  
12 the animal experiments and tissue collection; N.C.S. analyzed the data; and all authors contributed to editing the  
13 manuscript.

14  
15 This study was funded by NIH Grant R01 ES020867, P30 ES023513, and U2C ES030158. During the preparation of this  
16 manuscript, Nathaniel C. Stevens was supported by Grant Number T32 ES007059.

17  
18 Corresponding Author:

19  
20 Oliver Fiehn  
21 Director, NIH West Coast Metabolomics Center  
22 UC Davis Genome Center, Room 1313  
23 451 Health Sciences Drive  
24 University of California Davis  
25 Davis, CA 95616  
26 Tel: (530) 754-8258  
27 Email: [ofiehn@ucdavis.edu](mailto:ofiehn@ucdavis.edu)

28 **Abstract**

29  
30 Naphthalene is a ubiquitous environmental contaminant produced by combustion of fossil fuels and is a primary  
31 constituent of both mainstream and side stream tobacco smoke. Naphthalene elicits region-specific toxicity in airway club  
32 cells through cytochrome P450 (P450)-mediated bioactivation, resulting in depletion of glutathione and subsequent  
33 cytotoxicity. While effects of naphthalene in mice have been extensively studied, few experiments have characterized  
34 global metabolomic changes in the lung. In individual lung regions, we found metabolomic changes in microdissected  
35 mouse lung conducting airways and parenchyma obtained from animals sacrificed 2, 6, and 24 hours following  
36 naphthalene treatment. Data on 577 unique identified metabolites were acquired by accurate mass spectrometry-based  
37 assays focusing on lipidomics and non-targeted metabolomics of hydrophilic compounds. Statistical analyses revealed  
38 distinct metabolite profiles between the two major lung regions. In addition, the number and magnitude of statistically  
39 significant exposure-induced changes in metabolite abundance were different between lung airways and parenchyma for  
40 unsaturated lysophosphatidylcholines (LPCs), dipeptides, purines, pyrimidines, and amino acids. Importantly, temporal  
41 changes were found to be highly distinct for male and female mice, with males exhibiting predominant treatment-specific  
42 changes only at two hours post-exposure. In females, metabolomic changes persisted until six hours post-naphthalene  
43 treatment, which may explain the previously characterized higher susceptibility of female mice to naphthalene toxicity. In  
44 both males and females, treatment-specific changes corresponding to lung remodeling, oxidative stress response, and  
45 DNA damage were observed, which may provide insights into potential mechanisms contributing to the previously  
46 reported effects of naphthalene exposure in the lung.

47  
48 **Keywords:** metabolomics; lung; microdissection; polycyclic aromatic hydrocarbons

## 49 Introduction

50  
51 Naphthalene is a ubiquitous polycyclic aromatic hydrocarbon emitted into the atmosphere by combustion of fossil fuels,  
52 cigarette smoke, biomass burning, and several other sources (1). Humans are exposed to naphthalene primarily through  
53 inhalation but can also ingest naphthalene through diet (2). Widespread human exposure to naphthalene is of concern  
54 due to findings from animal studies that demonstrate acute toxicity as well as formation of neoplasms in rodents,  
55 prompting the classification of naphthalene as a potential human carcinogen (3). The proposed mechanism of  
56 naphthalene toxicity is through cytochrome P450 (P450) monooxygenase mediated bioactivation. CYP2F2, the  
57 predominant isoform responsible for metabolizing naphthalene in the mouse lung, rapidly metabolizes naphthalene into a  
58 reactive epoxide (4). This epoxide is detoxified via conjugation with glutathione, but can form DNA and protein adducts  
59 upon glutathione depletion, which is accompanied by cytotoxicity in the airway epithelium (5, 6). The physiological effects  
60 of naphthalene exposure include apical membrane blebbing and oxidative stress followed by changes in energy supply  
61 and ultimately loss of cells in the airway epithelium (7). The human ortholog, CYP2F1, has much lower activity towards  
62 naphthalene relative to CYP2F2, which may suggest that humans are at a lower risk for naphthalene-induced tumor  
63 formation (8, 9). However, transgenic expression of CYP2F1 and CYP2A13, another P450 isoform expressed in human  
64 lungs, was sufficient to bioactivate inhaled naphthalene in vivo and mediate naphthalene's respiratory toxicity in  
65 humanized mice (10).

66  
67 Non-ciliated lung airway epithelial cells, commonly referred to as club cells, highly express CYP2F2 and are highly  
68 susceptible to naphthalene induced injury in mice (11, 12). Club cells are most abundant in the distal airways of mice and  
69 in the respiratory bronchioles of non-human primates and humans (11). Club cell expression of CYP2F2 in mice is related  
70 to site-specific toxicity following naphthalene exposure. Additionally, female mice tend to be more susceptible to the toxic  
71 effects of naphthalene, highlighting the importance of both target region- and sex-specific effects of exposure (13). Most  
72 metabolomics studies use whole organs. However, in the case of naphthalene, the cellular targets of toxicity are club cells  
73 which are confined to the conducting airways. Nonetheless, lung regions that are not targeted for toxicity and that contain  
74 distinct cell types such as the alveolar cell types found in lung parenchyma may contribute to the initial response. These  
75 studies are needed to better understand the mechanisms of naphthalene toxicity that could lead to adverse outcomes in  
76 the lung in both target and non-target regions for acute cytotoxicity.

77  
78 Metabolomics enables global characterization of metabolites produced by an organism and metabolic changes associated  
79 with toxicant exposure or environmental interactions (14, 15). Previous studies have implemented nontargeted  
80 metabolomics analyses to characterize changes in metabolism in response to naphthalene, demonstrating significant  
81 alterations with respect to treatment (16, 17). However, these analyses have been limited to the sampling of homogenized  
82 whole lung lobes, precluding the ability to distinguish metabolic responses between different lung regions. Identifying  
83 these region-specific responses is especially important for toxicants that target specific cell types with heterogenous  
84 distribution throughout the lung (18). One potential technique to isolate lung regions is gross lung microdissection, which  
85 has previously been established as an approach to distinguish differences in response to naphthalene exposure between  
86 lung airways and the surrounding parenchyma (19).

87  
88 Our objective was to characterize metabolic responses to naphthalene in microdissected lung tissue from male and  
89 female mice using nontargeted metabolomics. We treated male and female C57BL/6 mice with a single i.p. injection of  
90 naphthalene and sampled gross microdissected airways and parenchyma at 2, 6, and 24 hours post-injection. Liquid  
91 chromatography - accurate mass tandem mass spectrometry (LC-MS/MS) assays for both lipids and hydrophilic  
92 metabolites were implemented to maximize coverage of annotations for both types of tissues. A series of multivariate and  
93 univariate statistical analyses was performed to identify metabolite changes among various groups. We hypothesized that  
94 metabolite profiles would differ both between tissue types and between treatments. Based on previous studies, we also  
95 anticipated female metabolite profiles to be perturbed more than males in response to treatment.

## 97 Materials and Methods

### 99 *Animal protocol*

100  
101 Adult male and female C57BL/6 mice (Envigo, Inc.) aged 8-10 weeks were housed on a 12/12 light/dark cycle and fed a  
102 diet consisting of Purina 5001 lab diet. Each animal received an i.p. injection of either corn oil, which was used as a  
103 vehicle control, or naphthalene dissolved in corn oil (200 mg/kg); all mice were treated at the same time of day, in the  
104 morning. Mice were euthanized at 2, 6, or 24 hours post-injection with a lethal injection of pentobarbital and necropsied  
105 immediately following euthanasia. Lungs from each mouse were cannulated, removed en bloc, and inflated using a  
106 heated solution of 1% agarose (w/v) in 0.01M phosphate buffered saline (PBS). The left lobe of each mouse was  
107 microdissected following a previous protocol (19). The resulting airways and parenchyma were immediately stored at -  
108 80°C until analysis. All animal experiments were conducted under approved protocols reviewed by the UC Davis  
109 Institutional Animal Care and Use Committee in accordance with guidelines for animal research established by the  
110 National Institutes of Health.

## Preparation of samples and LC/MS/MS analysis

Frozen microdissected tissues were lyophilized for approximately 24 hours. Dried samples were homogenized, and 1 mg of dried tissue was used for analysis, roughly equivalent to 10 mg of fresh tissue. Tissue homogenates were extracted on ice in 2-mL centrifuge tubes by adding 225  $\mu$ L of methanol and an internal standard mixture included in **Table E1** and 750  $\mu$ L of methyl tert-butyl ether containing cholesterol ester 22:1 (20). The top and bottom fractions were evaporated to dryness, which contained hydrophobic and hydrophilic metabolites, respectively. The dry samples containing hydrophilic metabolites were resuspended in 110  $\mu$ L of 80% acetonitrile, 20% water, and an internal standard mixture included in **Table E2**. The dry samples containing hydrophobic metabolites were resuspended in 100  $\mu$ L of 90% methanol, 10% toluene, and 50 ng/ml CUDA. Detailed methods for extraction and resuspension can be found in the online data supplement. All samples were analyzed by a ThermoFisher Scientific Vanquish UHPLC+ liquid chromatography system coupled to a Q-Exactive HF orbital ion trap mass spectrometer. Detailed analysis, instrument, and chromatography parameters are included in the online data supplement.

## Data processing and Statistics

Data processing was completed in MS-DIAL v.4.18 (22). Identification for all compounds was based on mass spectra from *in silico* libraries, MassBank of North America (<https://massbank.us>), and NIST20. Experimental spectra from MassBank of North America are publicly available and NIST20 spectra are commercially available for use. Matches were determined based on m/z, retention time, and MS/MS fragmentation pattern (23). The processed data were normalized using Systematic Error Removal in Random Forest (SERRF) (24), a machine-learning algorithm that normalizes experimental samples based on systematic variation in pooled QC samples. Statistical analysis was completed in R v.3.6.1 on the log-transformed dataset. One-way ANOVA was performed with Tukey's HSD post-hoc test to adjust for multiple comparisons. Multivariate statistical analysis was conducted by principal component analysis (PCA), hierarchical clustering analysis (HCA) and chemical similarity enrichment analysis (ChemRICH) (25). Volcano plots and heatmaps were generated in R using the Bioconductor packages EnhancedVolcano and ComplexHeatmap (26, 27).

## Results

### Metabolomic and lipidomics compound annotations

A total of 577 unique metabolites were annotated in the dataset across both lipophilic and hydrophilic chromatographic platforms and both electrospray modes. Unknown chromatographic features within the dataset were excluded from the final analysis. The annotations between lipidomics and HILIC analysis were broken down into major classes and is shown in **Figure 1**. A full list of compounds and classes for all platforms is included online in a supplemental datasheet. Among the annotated metabolites analyzed in the study, the values for median relative standard deviation of pooled experimental samples used as a measure of technical variance were 8.3% and 15.5% for compounds identified by lipidomics and HILIC, respectively. Most lipids identified in the dataset were neutral lipids, with a slightly lower number of phospholipids identified. Each major class of lipid was also categorized based on the degree of unsaturation, which can be attributed to biological function. The largest class of hydrophilic metabolites was annotated as derivatives of amino acids, included dipeptides.

### Metabolic differences between mouse airways and parenchyma dominate overall variance

We first determined which experimental factors contributed most to overall differences in the data set, using principal components analysis (PCA) as an unbiased multivariate dimension reduction technique (**Figure 2**). Principal component 1 (PC1) accounted for almost 20% of the overall data variance that was likely due to biological variation between sexes, treatments, and timepoints. Technical errors did not contribute to PC1 variance as seen by the close clustering of the quality control pool samples (**Figure 2**). No single sample needed to be removed due to potential gross difference to all other samples. The next vector, PC2, explained 14.3% of the total data variance, sufficient to completely distinguish lung airways and parenchyma samples within the data set. However, differences attributed to sex, naphthalene exposure or temporal changes did not dominate metabolic phenotypes to an extent that would lead to overt clustering along axes of PCA plots. Instead, these biological differences led to overall variance with slowly decreasing importance, leading to only 50% explained variance combined by the top-5 principal components (**Figure E1**).

### Statistical analysis of metabolite profiles between tissues and naphthalene treatment

Multivariate analysis identifying changes in metabolite classes between treatments and between tissues was next used to determine differences that contributed to the observed variation by PCA. Chemical enrichment similarity analysis (ChemRICH) enabled characterization of significantly altered metabolite classes in response to naphthalene treatment for

173 both lung airways and parenchyma. ChemRICH is a multivariate statistical approach used as an alternative to traditional  
174 pathway mapping that does not rely on database size and groups each metabolite based on its chemical structure, which  
175 often alludes to a compound's biological function(25). Initial ChemRICH analyses between naphthalene-treated and  
176 control animals revealed distinct differences at each timepoint and between sexes. In males, amino acids, purines, and  
177 several other metabolite classes were altered in response to treatment at 2 hours post-injection (**Figure E2**). However, no  
178 significant changes in metabolite classes were identified by ChemRICH at 6 or 24 hours in males. In contrast, changes in  
179 metabolite classes in females were present both at 2 hours (**Figure E3**) and at 6 hours, with the most extensive changes  
180 identified at 6 hours post-injection. Dipeptides and unsaturated LPCs were decreased in both airways and parenchyma  
181 following naphthalene treatment at 6 hours in females, whereas amino acid species were both increased and decreased  
182 following treatment (**Figure 3A-B**). Additionally, multiple pyrimidine nucleosides were decreased in parenchyma but not in  
183 airways of the naphthalene-treated animals, highlighting the difference in response between the two tissues (**Figure 3B**).  
184 For significantly altered metabolite classes in both airways and parenchyma of females, the average metabolite  
185 abundance of each class yielded the greatest fold difference at 6 hours comparing the two treatment groups (**Figure 3C-**  
186 **D**). Lastly, ChemRICH analysis comparing metabolite classes between tissues for each sex revealed striking differences  
187 in the lipid profiles of airways and parenchyma samples, which were dominated by substantially higher levels of  
188 triacylglycerides (TG) in airways than in parenchyma. Importantly, these differences did not appear to be mediated by  
189 treatment or sex, as the difference in TG abundance was evident at each timepoint in the control-treated male and female  
190 mice (**Figure E4**).

191  
192 Following the analysis of metabolite class changes, we next wanted to evaluate alterations within each significantly  
193 altered class to identify underlying changes in subclasses of metabolites related to a specific biological function. Due to  
194 the absence of significant differences in metabolite classes in male mice after 2 hours, we focused our subsequent  
195 analyses on female mice tissues sampled 6 hours post-injection. Hierarchical clustering analysis (HCA) comparing  
196 between both tissues and treatments demonstrated several significantly altered metabolites of the same subclass. Once  
197 again, unsaturated TGs were more abundant in airways than in parenchyma in the control mice, which were all clustered  
198 following HCA. Two clusters, one consisting of unsaturated cholesterol esters (CE) and another consisting of unsaturated  
199 phosphatidylcholines (PC) and LPCs were all lower in abundance in airways than in parenchyma in control-treated mice.  
200 Interestingly, the fold change in LPCs and PCs decreased in response to naphthalene treatment, whereas the fold change  
201 in TGs between both tissues was greatly increased following treatment (**Figure 4A**).

202  
203 HCA was also performed for clustering of significant changes comparing the effects of naphthalene treatment on female  
204 airways and parenchyma sampled 6 hours post-injection (**Figure 4B**). Purine and pyrimidine derivatives were clustered  
205 together and increased in both tissue types following naphthalene treatment, with airways experiencing greater relative  
206 increases in several species than parenchyma. Lysine-containing dipeptides and LPCs were also clustered together,  
207 which were ubiquitously decreased in response to naphthalene treatment (**Figure 4B**). The full lists of significantly altered  
208 metabolites are included in **Table E3** and **Table E4**.

#### 209 *Univariate analysis of individual metabolites significantly affected by naphthalene treatment*

210  
211 Lastly, we analyzed changes in individual metabolite abundance within each tissue type following naphthalene treatment  
212 to further distinguish the response of airways compared to parenchyma. For individual metabolite analysis, we also  
213 focused on female tissues sampled 6 hours post-injection as this timepoint included the greatest number of significantly  
214 altered metabolites between sexes and each timepoint. In both airways and parenchyma, adenosine 5'-diphosphoribose,  
215 riboflavin, cytidine 5'-diphosphate ethanolamine, and uridine diphosphate galactose were all altered following naphthalene  
216 treatment, passing a threshold log<sub>2</sub> fold change of 5 (**Figure 5 A-B**). However, the fold change of cytidine 5'-diphosphate  
217 ethanolamine, adenosine 5'-diphosphoribose, and uridine diphosphate galactose were all relatively greater in airways  
218 than in parenchyma, further indicating a tissue-specific response to treatment. Moreover, dipeptides containing lysine  
219 residues displayed greater relative fold changes in airways relative to changes in parenchyma. The magnitude of these  
220 changes coupled with their biological function may potentially contribute to some of the region-specific effects of  
221 naphthalene in mice.  
222  
223

## 224 **Discussion**

225  
226 Our study demonstrates the importance of region-specific metabolomic analysis of the lung. Previous metabolomics  
227 studies of the lung have analyzed homogenized whole lung tissue to characterize the effects of naphthalene in mice (16,  
228 17, 28). However, the results of our study demonstrated significant differences when comparing individual regions of  
229 microdissected lung tissue from male and female mice that received i.p. injections of naphthalene. PCA displayed clear  
230 separation of lung airways and parenchyma regardless of sex, treatment, or time (**Figure 2A**). Significant variation was  
231 present within each tissue, which was most likely attributable to significant differences in metabolite classes between  
232 treatments and timepoints sampled within the study.  
233



234 ChemRICH analysis and HCA identified metabolite classes and subclass abundances that were unique based on tissue  
235 (**Figure 3, Figure 4**). Unsaturated TGs, PCs, and CEs were the predominant metabolite classes that varied in abundance  
236 between lung airways and parenchyma, with the relative abundance of unsaturated TGs being much greater in airways  
237 compared to PCs and CEs that were less abundant in airways. The relative abundance of these classes following  
238 naphthalene treatment shifted significantly, as unsaturated TGs greatly increased in abundance and differences between  
239 PCs and CEs became less marked in females at 6 hours (**Figure 4A**). These changes may reflect remodeling of the  
240 epithelial cell membrane and lipolysis following cytotoxicity and damage to the epithelium resulting from naphthalene  
241 treatment (5, 29). Furthermore, intake and export of TGs is dependent upon activity of apolipoprotein E (Apo-E) and  
242 apolipoprotein A-I (Apo-AI), respectively. Both proteins are expressed in the lung and serve important roles in maintaining  
243 normal lipid metabolism (30). Alterations in either Apo-E or Apo-AI are associated with several lung diseases and  
244 contribute to increased lung inflammation, oxidative stress, and collagen deposition (31–33). Although these studies have  
245 not examined the effect of naphthalene treatment on Apo-E and Apo-AI expression, selective TG accumulation in the  
246 airways of naphthalene-treated mice may suggest dysregulation of one of these proteins.

247  
248 Metabolite classes and subclasses were also significantly altered when comparing the effects of naphthalene treatment in  
249 females at 6 hours post-injection. LPCs and dipeptides were the predominant classes affected by treatment, with  
250 dipeptides containing lysine residues constituting several significant differences reported in dipeptide abundance (**Figure**  
251 **4B**). LPCs are bioactive lipids formed from phospholipase A<sub>2</sub>, which can modulate inflammatory responses and are  
252 implicated in lung disease (34, 35). LPCs can undergo conversion to phosphatidylcholines through  
253 lysophosphatidylcholine acyltransferase (LPCAT) or can be modified by another enzyme, autotaxin, to lysophosphatidic  
254 acid (LPA) (36). Previous studies have established a potential role of LPA in the development of pulmonary fibrosis  
255 through pharmacologic inhibition of the LPA receptor 1, which reduced disease severity in a bleomycin mouse model of  
256 pulmonary fibrosis (37, 38). Significant reductions in LPC following naphthalene treatment may result from increased LPA  
257 production or could result from increased production of phosphatidylcholines from LPCs through the Lands' Cycle (**Figure**  
258 **6A**) (34). Concurrent decreases in many glycine, lysine and proline-containing dipeptides may further support lung  
259 remodeling in response to naphthalene treatment considering the role of lysine and proline as important constituents of  
260 the extracellular matrix within the lung (39).

261  
262 Comparisons of individual metabolites were drawn to provide insights into metabolites with unique biological functions in  
263 addition to metabolite class changes. Univariate analysis displayed striking alterations in many amino acids and  
264 pyrimidine derivatives in both female naphthalene-treated airways and parenchyma at 6 hours (**Figure 5 A-B**). Among the  
265 metabolites most substantially altered were uridine diphosphate galactose, cytidine 5'-diphosphate ethanolamine, and  
266 adenosine 5'-diphosphoribose. Interestingly, the magnitude of fold changes for each of these metabolites was much  
267 greater in airways relative to the fold change between naphthalene and control-treated parenchyma. Cytidine 5'-  
268 diphosphate ethanolamine is an important precursor used in the synthesis of phosphatidylethanolamines, which are  
269 essential components of the cell membrane (40). The significant increase of this compound in naphthalene treated mice  
270 recapitulates the observed changes in other metabolites following treatment, further implicating remodeling of the cell  
271 membrane as an effect of treatment.

272  
273 Changes in cell membrane characteristics and remodeling may be exacerbated by the effects of significantly reduced  
274 lysine and significantly increased adenosine 5'-diphosphoribose also observed following treatment. Lysine has previously  
275 been reported to reduce the severity of lipopolysaccharide-induced acute lung injury by reducing lipid peroxidation and  
276 proinflammatory responses in mice (41). Reduced abundance of lysine resulting from naphthalene treatment may  
277 contribute to increased oxidative stress and glutathione depletion observed in previous studies (12). In addition to  
278 glutathione depletion, naphthalene metabolites can form DNA adducts that lead to further cytotoxicity (6). The increased  
279 abundance of adenosine 5'-diphosphoribose, which is a subunit of poly(ADP-ribose) upon DNA damage by poly  
280 adenosine diphosphate ribose polymerase (PARP), provides additional evidence supporting these previous findings  
281 (**Figure 6B**) (42–44).

282  
283 Significant metabolite changes within each tissue following naphthalene treatment were almost exclusively confined to  
284 earlier timepoints, with few significant differences remaining between treatment groups 24 hours post-injection. This  
285 observation may allude to compensatory mechanisms present soon after naphthalene treatment when cells undergo  
286 vacuolization and become permeable, which contrasts with the 24-hour timepoint where club cells have exfoliated from  
287 the epithelial membrane and many are no longer present (45). Strikingly, significant metabolic changes were not limited to  
288 the airways of naphthalene-treated mice, with similar alterations being present in both airways and parenchyma (**Figure**  
289 **3**). Club cells are the primary target for naphthalene toxicity in the mouse lung due to relatively high expression of  
290 CYP450 isoforms catalyzing the formation of reactive naphthalene metabolites (11). However, cell-to-cell communication  
291 is essential for maintaining homeostasis in the lung in response to injury and could potentially affect metabolic responses  
292 of other cell types such as those found in the lung parenchyma (46).

293  
294 When comparing metabolite changes between each sex, male mice displayed significant alterations in multiple metabolite  
295 classes at 2 hours post-injection (**Figure E2**). In both males and females, the number of significantly altered metabolites

296 was much lower 24 hours post-injection (data not shown). However, sex-specific differences in metabolism were most  
297 evident when comparing the effect of treatment in lung airways and parenchyma across timepoints. Changes in pyrimidine  
298 nucleotide sugars, LPCs, and dipeptides were limited to the 2 hours post-injection in males, whereas these metabolites  
299 were significantly altered at both 2 hours and 6 hours in females (**Figure E3, Figure 3**). Significant changes in metabolic  
300 profiles of male and female mice were mostly returned to baseline at 24 hours post-injection in both tissues when  
301 comparing treatments. It is well established that susceptibility to naphthalene toxicity is greater in female mice than in  
302 male mice (13, 45). These observations may be attributed to the persistence of metabolic changes related to DNA  
303 damage, oxidative stress, and lung remodeling in females but not in males. Furthermore, metabolite changes in males  
304 may also indicate protective mechanisms that mitigate naphthalene toxicity compared to females, although this was not a  
305 primary focus of our analysis.

306  
307 The acute toxic effects of naphthalene exposure are well characterized in mice. However, few studies have utilized  
308 metabolomics to evaluate the contribution of global lung metabolite changes underlying the mechanism of naphthalene  
309 toxicity (7, 16, 28). Lung metabolomics studies in mice routinely analyze homogenized whole lung lobes, which prevents  
310 the characterization of region-specific responses following exposure to toxicants that target individual regions of the lung.  
311 The objective of our study was to identify region-specific differences in metabolite profiles from microdissected lung  
312 airways and parenchyma of naphthalene treated mice. The findings from this study identified inherent differences between  
313 the metabolite profiles of lung airways and parenchyma, which were further altered by naphthalene treatment. We also  
314 found significant differences in multiple metabolite classes related to oxidative stress, DNA damage, and membrane  
315 remodeling in both airways and parenchyma treated with naphthalene. Importantly, the responses between male and  
316 female mice varied greatly with respect to the duration and extent of significant changes in metabolite profiles, further  
317 validating the findings of previous studies. Future experiments are needed to examine the effects of chronic naphthalene  
318 exposure to determine the persistence of acute metabolite changes that could influence the development of lung disease.  
319 Nonetheless, the characterization of differences in lung metabolite profiles between lung airways and parenchyma in our  
320 study underscores the importance of region-specific metabolomic analysis of lung responses to target-specific toxicants.

### 321 **Acknowledgements**

322 We would like to thank the members of the Van Winkle lab for their assistance with the execution of the animal protocol in  
323 this study. We also thank the members of the UC Davis Air Pollution and Lung Biology Journal Club for their review and  
324 suggestions provided for this manuscript.  
325

1. Jia C, Batterman S. A critical review of naphthalene sources and exposures relevant to indoor and outdoor air. *International Journal of Environmental Research and Public Health* 2010;7:2903–2939.
2. Li Z, Mulholland JA, Romanoff LC, Pittman EN, Trinidad DA, Lewin MD, Sjödin A. Assessment of non-occupational exposure to polycyclic aromatic hydrocarbons through personal air sampling and urinary biomonitoring. *Journal of Environmental Monitoring* 2010;12:1110–1118.
3. NTP. *Ntp Technical Report on the Toxicology and Carcinogenesis Studies of Naphthalene in F344 / N Rats ( Inhalation Studies ) National Toxicology Program. Technical Report Series* 2000. at <<http://ehis.niehs.nih.gov>>.
4. Li L, Wei Y, Van Winkle L, Zhang QY, Zhou X, Hu J, Xie F, Kluetzman K, Ding X. Generation and characterization of a Cyp2f2-null mouse and studies on the role of CYP2F2 in naphthalene-induced toxicity in the lung and nasal olfactory mucosa. *Journal of Pharmacology and Experimental Therapeutics* 2011;339:62–71.
5. Plopper CG, Van Winkle LS, Fanucchi M v., Malburg SRC, Nishio SJ, Chang A, Buckpitt AR. Early events in naphthalene-induced acute Clara cell toxicity II. Comparison of glutathione depletion and histopathology by airway location. *American Journal of Respiratory Cell and Molecular Biology* 2001;24:272–281.
6. Carratt SA, Hartog M, Buchholz BA, Kuhn EA, Collette NM, Ding X, Van Winkle LS. Naphthalene genotoxicity: DNA adducts in primate and mouse airway explants. *Toxicology Letters* 2019;305:103–109.
7. Ling YS, Liang HJ, Chung MH, Lin MH, Lin CY. NMR- and MS-based metabolomics: Various organ responses following naphthalene intervention. *Molecular BioSystems* 2014;10:1918–1931.
8. Lanza DL, Code E, Crespi CL, Gonzalez FJ, Yost GS. SPECIFIC DEHYDROGENATION OF 3-METHYLINDOLE AND EPOXIDATION OF NAPHTHALENE BY RECOMBINANT HUMAN CYP2F1 EXPRESSED IN LYMPHOBLASTOID CELLS. *Drug Metabolism and Disposition* 1999;27:798–803.
9. Shultz MA, Choudary P v, Buckpitt AR. Role of Murine Cytochrome P-450 2F2 in Metabolic Activation of Naphthalene and Metabolism of Other Xenobiotics 1. *Journal of Pharmacology and Experimental Therapeutics* 1999;290:281–288.
10. Li L, Carratt S, Hartog M, Kovalchuk N, Jia K, Wang Y, Zhang QY, Edwards P, Van Winkle L, Ding X. Human CYP2A13 and CYP2F1 mediate naphthalene toxicity in the lung and nasal mucosa of CYP2A13/2F1-humanized mice. *Environmental Health Perspectives* 2017;125:067004.
11. Buckpitt A, Boland B, Isbell M, Morin D, Shultz M, Baldwin R, Chan K, Karlsson A, Lin C, Taff A, West J, Fanucchi M, Van Winkle L, Plopper C. Naphthalene-induced respiratory tract toxicity: Metabolic mechanisms of toxicity. *Drug Metabolism Reviews* 2002;34:791–820.
12. Phimister AJ, Lee MG, Morin D, Buckpitt AR, Plopper CG. Glutathione depletion is a major determinant of inhaled naphthalene respiratory toxicity and naphthalene metabolism in mice. *Toxicological Sciences* 2004;82:268–278.



13. Carratt SA, Kovalchuk N, Ding X, Van Winkle LS. Metabolism and Lung Toxicity of Inhaled Naphthalene: Effects of Postnatal Age and Sex. *Toxicological Sciences* 2019;170:536–548.
14. Bundy JG, Davey MP, Viant MR. Environmental metabolomics: A critical review and future perspectives. *Metabolomics* 2009;5:3–21.
15. Lankadurai BP, Nagato EG, Simpson MJ. Environmental metabolomics: an emerging approach to study organism responses to environmental stressors. *Environmental Reviews* 2013;21:180–205.
16. Lee SH, Hong SH, Tang CH, Ling YS, Chen KH, Liang HJ, Lin CY. Mass spectrometry-based lipidomics to explore the biochemical effects of naphthalene toxicity or tolerance in a mouse model. *PLoS ONE* 2018;13:e0204829.
17. Lin C-Y, Huang F-P, Ling YS, Liang H-J, Lee S-H, Hu M-Y, Tsao P-N. Use of Nuclear Magnetic Resonance-Based Metabolomics to Characterize the Biochemical Effects of Naphthalene on Various Organs of Tolerant Mice. In: Motta A, editor. *PLOS ONE* 2015;10:e0120429.
18. Buckpitt A, Morin D, Murphy S, Edwards P, Van Winkle L. Kinetics of naphthalene metabolism in target and non-target tissues of rodents and in nasal and airway microsomes from the Rhesus monkey. *Toxicology and Applied Pharmacology* 2013;270:97–105.
19. Plopper CG, Chang AM, Pang A, Buckpitt AR. Use of microdissected airways to define metabolism and cytotoxicity in murine bronchiolar epithelium. *Experimental Lung Research* 1991;17:197–212.
20. Cajka T, Fiehn O. Increasing lipidomic coverage by selecting optimal mobile-phase modifiers in LC-MS of blood plasma. *Metabolomics* 2016;12:1–11.
21. Koelmel JP, Kroeger NM, Gill EL, Ulmer CZ, Bowden JA, Patterson RE, Yost RA, Garrett TJ. Expanding Lipidome Coverage Using LC-MS/MS Data-Dependent Acquisition with Automated Exclusion List Generation. *Journal of the American Society for Mass Spectrometry* 2017;28:908–917.
22. Tsugawa H, Cajka T, Kind T, Ma Y, Higgins B, Ikeda K, Kanazawa M, Vanderghelynst J, Fiehn O, Arita M. MS-DIAL: Data-independent MS/MS deconvolution for comprehensive metabolome analysis. *Nature Methods* 2015;12:523–526.
23. Bonini P, Kind T, Tsugawa H, Barupal DK, Fiehn O. Retip: Retention Time Prediction for Compound Annotation in Untargeted Metabolomics. *Analytical Chemistry* 2020;92:7515–7522.
24. Fan S, Kind T, Cajka T, Hazen SL, Tang WHW, Kaddurah-Daouk R, Irvin MR, Arnett DK, Barupal DK, Fiehn O. Systematic Error Removal Using Random Forest for Normalizing Large-Scale Untargeted Lipidomics Data. *Analytical Chemistry* 2019;91:3590–3596.
25. Barupal DK, Fiehn O. Chemical Similarity Enrichment Analysis (ChemRICH) as alternative to biochemical pathway mapping for metabolomic datasets. *Scientific Reports* 2017;7:14567.

26. Gu Z, Eils R, Schlesner M. Complex heatmaps reveal patterns and correlations in multidimensional genomic data. *Bioinformatics* 2016;32:2847–2849.
27. Blighe K, Rana S LM. EnhancedVolcano: Publication-ready volcano plots with enhanced colouring and labeling. R package version 1.6.0. 2020;at <<https://github.com/kevinblighe/EnhancedVolcano>>.
28. Hong JH, Lee WC, Hsu YM, Liang HJ, Wan CH, Chien CL, Lin CY. Characterization of the biochemical effects of naphthalene on the mouse respiratory system using NMR-based metabolomics. *Journal of Applied Toxicology* 2014;34:1379–1388.
29. Lass A, Zimmermann R, Oberer M, Zechner R. Lipolysis - A highly regulated multi-enzyme complex mediates the catabolism of cellular fat stores. *Progress in Lipid Research* 2011;50:14–27.
30. Yao X, Gordon EM, Figueroa DM, Barochia A v., Levine SJ. Emerging roles of apolipoprotein e and apolipoprotein A-I in the pathogenesis and treatment of lung disease. *American Journal of Respiratory Cell and Molecular Biology* 2016;55:159–169.
31. Yan Y jie, Li Y, Lou B, Wu M ping. Beneficial effects of ApoA-I on LPS-induced acute lung injury and endotoxemia in mice. *Life Sciences* 2006;79:210–215.
32. Rice SJ, Liu X, Miller B, Joshi M, Zhu J, Caruso C, Gilbert C, Toth J, Reed M, Rassaei N, Das A, Barochia A, El-Bayoumy K, Belani CP. Proteomic profiling of human plasma identifies apolipoprotein E as being associated with smoking and a marker for squamous metaplasia of the lung. *PROTEOMICS* 2015;15:3267–3277.
33. Kim TH, Lee YH, Kim KH, Lee SH, Cha JY, Shin EK, Jung S, Jang AS, Park SW, Uh ST, Kim YH, Park JS, Sin HG, Youm W, Koh ES, Cho SY, Paik YK, Rhim TY, Park CS. Role of Lung Apolipoprotein A-I in Idiopathic Pulmonary Fibrosis Antiinflammatory and Antifibrotic Effect on Experimental Lung Injury and Fibrosis. *Am J Respir Crit Care Med* 2010;182:633–642.
34. Wang B, Tontonoz P. Phospholipid Remodeling in Physiology and Disease. *Annual Review of Physiology* 2019;81:165–188.
35. Yoder M, Zhuge Y, Yuan Y, Holian O, Kuo S, Van Breemen R, Thomas LL, Lum H. Bioactive lysophosphatidylcholine 16:0 and 18:0 are elevated in lungs of asthmatic subjects. *Allergy, Asthma and Immunology Research* 2014;6:61–65.
36. Law SH, Chan ML, Marathe GK, Parveen F, Chen CH, Ke LY. An updated review of lysophosphatidylcholine metabolism in human diseases. *International Journal of Molecular Sciences* 2019;20:1149.
37. Oikonomou N, Mouratis M-A, Tzouvelekis A, Kaffe E, Valavanis C, Vilaras G, Karameris A, Prestwich GD, Bouros D, Aidinis V. Pulmonary Autotaxin Expression Contributes to the Pathogenesis of Pulmonary Fibrosis. *Am J Respir Cell Mol Biol* 2012;47:566–574.
38. Ninou I, Magkrioti C, Aidinis V. Autotaxin in pathophysiology and pulmonary fibrosis. *Frontiers in Medicine* 2018;5:.

39. Bradley H, Nccoxnell SD, Crystal RG. Lung Collagen Composition and Synthesis. *Journal of Biological Chemistry* 1974;219:2674–2683.
40. Brunetti M, Gaiti A, Porcellati G. Synthesis of phosphatidylcholine and phosphatidylethanolamine at different ages in the rat brain in vitro. *Lipids* 1979;14:925–931.
41. Zhang Y, Yu W, Han D, Meng J, Wang H, Cao G. L-lysine ameliorates sepsis-induced acute lung injury in a lipopolysaccharide-induced mouse model. *Biomedicine and Pharmacotherapy* 2019;118:109307.
42. Hou WH, Chen SH, Yu X. Poly-ADP ribosylation in DNA damage response and cancer therapy. *Mutation Research* 2019;780:82–91.
43. Altmeyer M, Messner S, Hassa PO, Fey M, Hottiger MO. Molecular mechanism of poly(ADP-ribosyl)ation by PARP1 and identification of lysine residues as ADP-ribose acceptor sites. *Nucleic Acids Research* 2009;37:3723–3738.
44. Satoh MS, Lindahl T. Role of poly(ADP-ribose) formation in DNA repair. *Nature* 1992;356:356–358.
45. Van Winkle LS, Gunderson AD, Shimizu JA, Baker GL, Brown CD. Gender differences in naphthalene metabolism and naphthalene-induced acute lung injury. *American Journal of Physiology-Lung Cellular and Molecular Physiology* 2002;282:L1122–L1134.
46. Gupta R, Radicioni G, Abdelwahab S, Dang H, Carpenter J, Chua M, Mieczkowski PA, Sheridan JT, Randell SH, Kesimer M. Intercellular Communication between Airway Epithelial Cells Is Mediated by Exosome-Like Vesicles. *Am J Respir Cell Mol Biol* 2019;60:209–220.

326 **Figure 1. Overview of annotations identified by lipidomics and HILIC analysis.** *Left:* complex lipids were classified by  
327 ClassyFire software into seven major lipid classes, consisting of 307 unique annotations. *Right:* Hydrophilic compounds  
328 were classified into 10 major metabolite classes, comprising 270 unique annotations. ClassyFire categories with less than  
329 5 compounds were summarized into “Other” class labels.

330  
331 **Figure 2. Principal Components Analysis (PCA) of metabolic variance in mouse lungs.** PC2 discriminates metabolic  
332 phenotypes of mouse airways and parenchyma. Pool samples were prepared by mixing fractions of each extracted  
333 parenchyma and airways sample, which were used as a measure of technical variance of the analytical method.

334  
335 **Figure 3. Metabolite profiles of lung airways and parenchyma are altered in response to naphthalene-treatment in**  
336 **females 6 hours post-injection. A-B)** ChemRICH plots comparing naphthalene-treated airways and parenchyma in  
337 female mice 6 hours post-injection, respectively. The size of each circle represents the relative number of metabolites  
338 contained within each cluster. Red circles indicate all metabolites increase within a cluster, while blue circles indicate all  
339 metabolites decrease within a cluster. Pink and purple circles represent a mix consisting of mostly increased and  
340 decreased metabolite abundances, respectively. Axes correspond to the  $-\log P$  value of a metabolite class plotted against  
341 index values assigned to each metabolite in the online datasheet included as supplemental material. P-values used for  
342 the input of each ChemRICH were calculated by one-way ANOVA with Tukey’s post-hoc analysis. P-values for each  
343 ChemRICH cluster were calculated using the Kolmogorov-Smirnov test. **C-D)** Boxplots displaying the average intensities  
344 for the largest clusters of metabolite classes altered in female airways and parenchyma for all timepoints, respectively.  
345 Axes represent the  $\log_{10}$  peak height of each sample for each timepoint, and samples with values greater than 1.5 times  
346 the interquartile range are indicated by dots on each plot. \*  $p < 0.05$ , \*\*\*  $p < 0.001$ .

347  
348 **Figure 4. Naphthalene treatment greatly alters the profiles of individual metabolite subclasses in female airways**  
349 **and parenchyma at 6 hours. A)** Heatmap comparing metabolite abundance of airways relative to parenchyma for each  
350 treatment at 6 hours. **B)** Heatmap comparing metabolite abundance of naphthalene-treated tissues relative to control-  
351 treated tissues at 6 hours for each tissue type. For both heatmaps, Euclidean clustering was used for HCA. Fold changes  
352 are expressed as the  $\log_2$  fold change of each metabolite to indicate direction. Only metabolites that were statistically  
353 significant in at least one comparison were included in each figure. P-values were calculated by one-way ANOVA and  
354 Tukey’s post-hoc analysis. Lists of metabolites present in each heatmap are included in **Table S3** and **Table S4**.

355  
356 **Figure 5. Individual metabolite changes in naphthalene-treated female mice differ in magnitude and between**  
357 **tissues. A-B)** Volcano plot of  $-\log_{10}$  p-value versus  $\log_2$  fold change of metabolites in naphthalene-treated airways and  
358 parenchyma relative to control, respectively. P-values were determined using one-way ANOVA with Tukey’s post-hoc  
359 analysis. An arbitrary  $\log_2$  fold change cutoff of 5 was used to indicate metabolites with especially large differences  
360 between treatment groups. A p-value threshold of  $< 0.05$  was selected to indicate statistical significance. Metabolites that  
361 pass both thresholds are indicated in red, whereas metabolites not passing either threshold are shaded in grey. Yellow  
362 and blue dots represent metabolites that only pass either the p-value or fold change threshold, respectively.

363  
364 **Figure 6. Naphthalene alters metabolites related to lung remodeling, oxidative stress, and DNA damage. A)** De  
365 novo synthesis of phosphatidylcholine via the Kennedy pathway and subsequent breakdown into lysophosphatidylcholine  
366 by phospholipase A<sub>2</sub> (PLA<sub>2</sub>). Lysophosphatidylcholine can either be metabolized by autotaxin into lysophosphatidic acid or  
367 converted back into phosphatidylcholine through lysophosphatidylcholine acyltransferase (LPCAT). **B)** ADP-ribose is a  
368 subunit of poly(ADP-ribose), which is formed by poly adenosine diphosphate ribose polymerase (PARP) in response to  
369 DNA strand breaks. Created with Biorender.com.

370

371

Figure 1

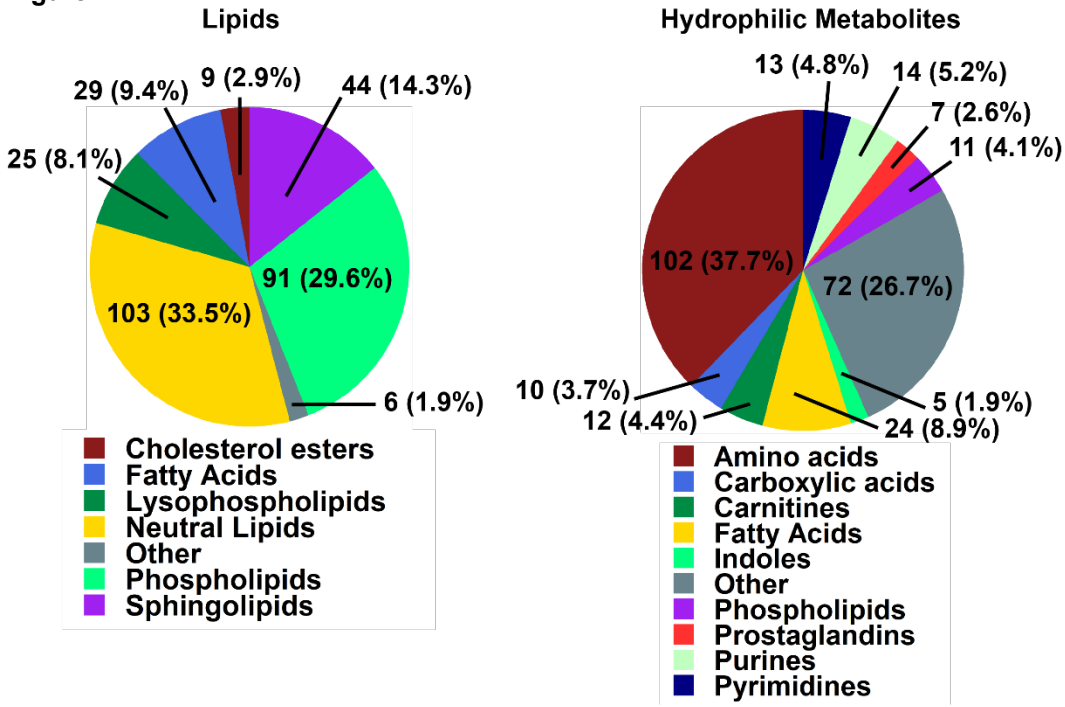

372

373

374

Figure 2

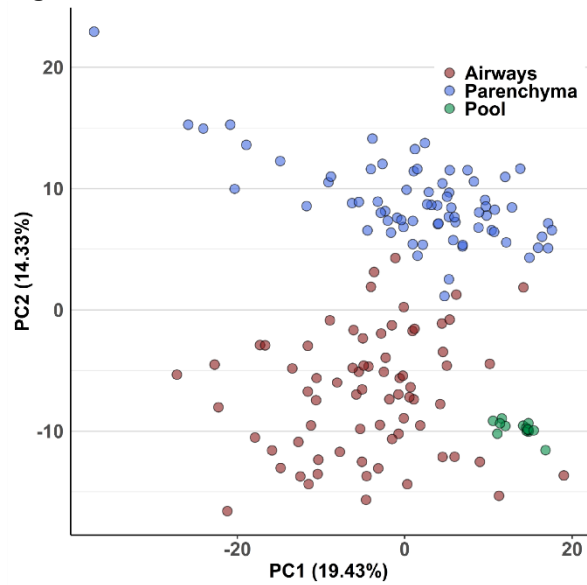

375

376

377

Figure 3



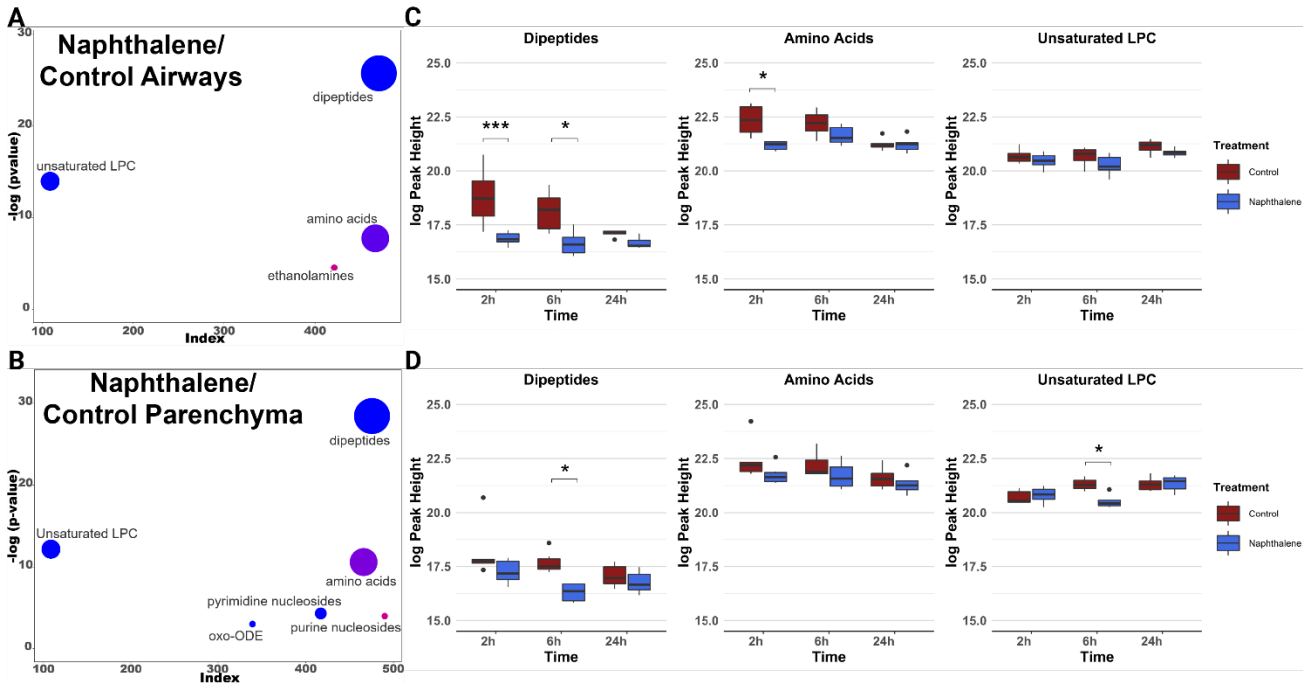

378  
379  
380

Figure 4

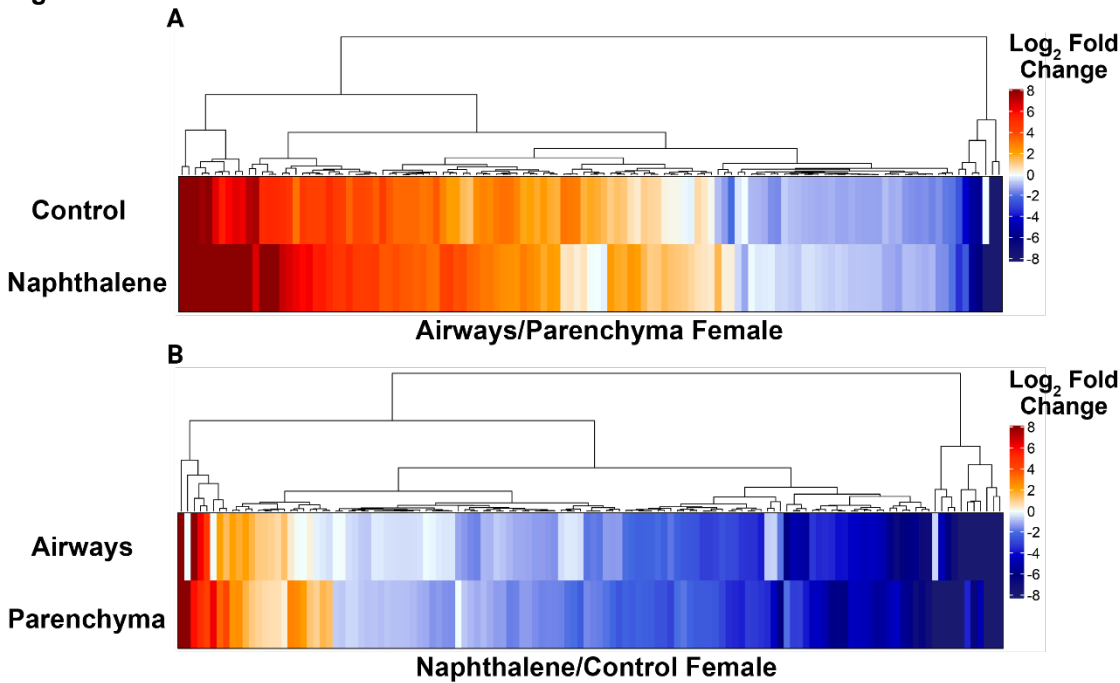

381  
382  
383

Figure 5

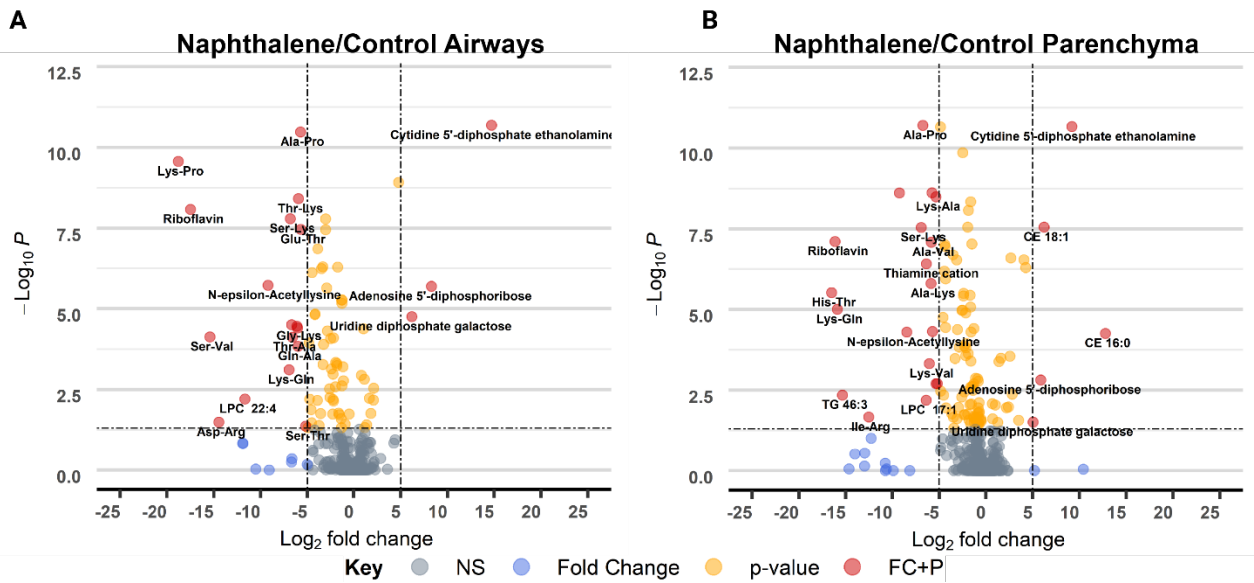

384  
385  
386

Figure 6

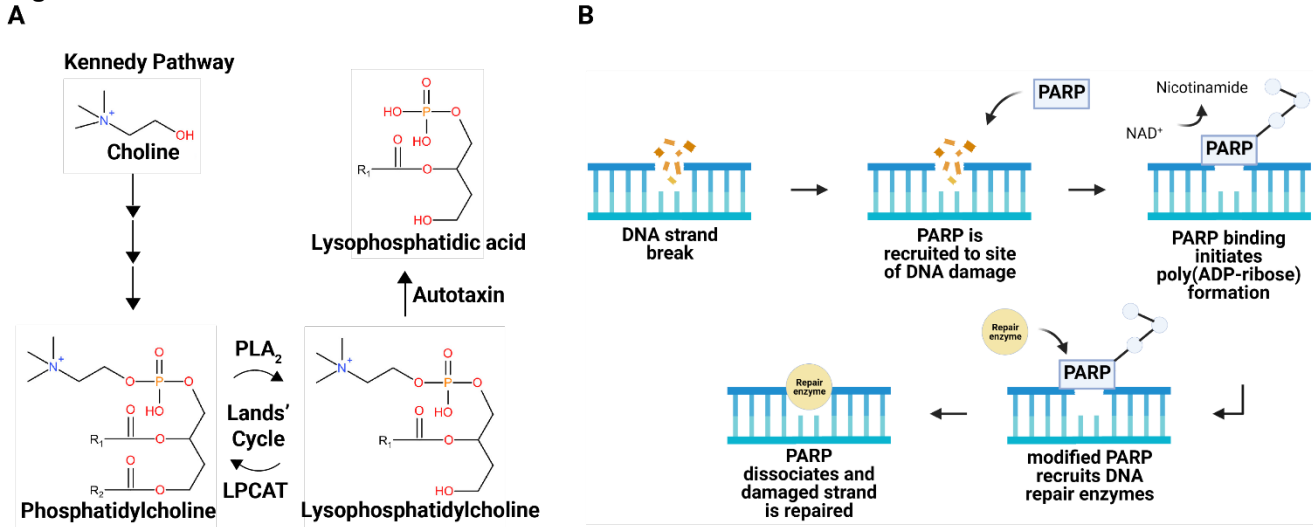

387

388 **Supplementary Material**

389

390 **Materials and Methods**

391

392 *Animal protocol*

393

394 Adult male and female C57Bl6 mice (Envigo, Inc.) aged 8-10 weeks were housed on a 12/12 light/dark cycle and fed a  
395 diet consisting of Purina 5001 lab diet. Each animal received i.p. injections of either corn oil, which was used as a vehicle  
396 control, or naphthalene dissolved in corn oil (200 mg/kg) at the same time each morning. Mice were euthanized at 2, 6, or  
397 24 hours post-injection with a lethal injection of pentobarbital and necropsied immediately following euthanasia. Lungs  
398 from each mouse were cannulated, removed en bloc, and inflated using a heated solution of 1% agarose (w/v) in 0.01M  
399 phosphate buffered saline (PBS). The left lobe of each mouse was microdissected following a previous protocol (19). The  
400 resulting airways and parenchyma were immediately stored at -80°C until analysis. All animal experiments were  
401 conducted under approved protocols reviewed by the UC Davis Institutional Animal Care and Use Committee in  
402 accordance with guidelines for animal research established by the National Institutes of Health.

403

404 *Preparation of samples for LC/MS/MS analysis*

405

406 Frozen airways and parenchyma sections were lyophilized using a Labconco freeze dryer for approximately 24 hours.  
407 Dried samples were homogenized using a mechanical disrupter (Geno/Grinder®), and 1 mg of dried tissue was utilized for  
408 analysis, which was roughly equivalent to 10 mg of fresh tissue. Tissue homogenates were extracted on ice in 2mL  
409 centrifuge tubes by adding 225 µL of methanol and an internal standard mixture included in **Table E1** and 750 µL of  
410 methyl tert-butyl ether containing cholesterol ester 22:1 (20). Samples were vortexed for 10 seconds and mixed using an  
411 orbital mixer for 5 minutes at 4°C. Each tube received 188 µL of LC-MS grade water, and the samples were vortexed for  
412 an additional 20 seconds and centrifuged at 14,000 rcf for 2 minutes. The upper hydrophobic phase was transferred into  
413 1.5-mL centrifuge tubes each containing 350 µL for lipidomic analysis. The bottom aqueous phase was transferred into  
414 1.5-mL centrifuge tubes for analysis of hydrophilic metabolites. A portion of the remaining upper hydrophobic phase (75  
415 µL) from each airway and parenchyma sample was pooled into a single centrifuge tube and vortexed for 20 seconds.  
416 Individual pooled sample tubes were prepared by adding 350 µL of the pooled volume and were used as quality controls  
417 in the analysis. All samples were evaporated to dryness using a Labconco CentriVap.

418

419 The dried samples containing lipids were resuspended in 100 µL of 90% methanol, 10% toluene, and 50 ng/mL 12-  
420 [[(cyclohexylamino)carbonyl]amino]-dodecanoic acid (CUDA). The dry samples containing hydrophilic metabolites were  
421 resuspended in 110 µL of 80% acetonitrile, 20% water, and an internal standard mixture included in **Table E2**. The  
422 samples were vortexed for 10 seconds, sonicated at room temperature for 5 minutes, and centrifuged at 16,000 rcf for 2  
423 minutes. The resuspended samples were pooled by transferring 10 µL from each airway and parenchyma sample into a  
424 single centrifuge tube, followed by mixing for an additional 10 seconds. Vials were prepared by transferring 90 µL of the  
425 resuspended samples from the sample tubes.

426

427 *Iterative Exclusions*

428

429 Spectra were acquired for each experimental sample for all platforms and combined using IE-Omics (21). Briefly, a single  
430 pooled sample was analyzed in each platform, and an R-script was used to select precursors based on ddMS<sup>2</sup> topN  
431 analysis. The script was also used to generate an exclusion list for subsequent injections of the same sample. The list  
432 was imported into the instrument method to exclude the most abundant precursor ions from fragmentation in the  
433 reinjected sample. In total, 5 consecutive sample injections were run for all platforms.

434

435 *LC/MS/MS analysis for lipids and hydrophilic metabolites*

436

437 All samples were analyzed by a ThermoFisher Scientific Vanquish UHPLC+ liquid chromatography system coupled to a  
438 Q-Exactive HF orbital ion trap mass spectrometer. A Waters Acquity UPLC CSH C18 column equipped with a CSH C18  
439 VanGuard Pre-column was used to separate metabolites for lipidomics analysis (20). Hydrophilic metabolites were  
440 analyzed through hydrophilic interaction liquid chromatography (HILIC) using a Waters UPLC BEH Amide column,  
441 equipped with a BEH Amide VanGuard Pre-column. The sample order consisted of repeated injections of one extraction  
442 blank, one bioreclaimed plasma sample, one pool of each experimental sample, followed by 10 experimental samples that  
443 were randomized prior to acquisition. For both lipidomics and HILIC analysis, 3 µL sample was injected for positive  
444 electrospray ionization and 6 µL sample for negative electrospray ionization mode. Mobile phase composition for lipid  
445 analysis consisted of 60/40 v/v acetonitrile:water (A) and 90/10 v/v isopropanol:acetonitrile (B). Modifiers used for positive  
446 mode were 0.1% formic acid and 10 mM ammonium formate, and 10mM ammonium acetate was the only modifier used  
447 for negative mode. A nonlinear gradient was run for 14.2 minutes at a constant flow rate of 0.6 mL/min. starting at 15% B

0-2 minutes, 30% B 2-2.5 minutes, 48% B 2.5-11 minutes, 82% B 11-11.5 minutes, 99% 11.5-12 minutes, 99% B 12-12.1 minutes, 15% B 12.1-14.2 minutes. The data acquisition parameters for positive mode were: 65°C column chamber temperature, 65°C post-column cooler temperature, 65°C column preheater temperature, 13-minute acquisition time, 120-1700 mass-to-charge (m/z) acquisition mass range, and stepped normalized collision energies of 20, 30, and 40%. The parameters for negative mode were identical except the acquisition mass range, which was from 113.4 to 1700 m/z.

Mobile phase composition for HILIC analysis consisted of 100% water (A) and 95/5 v/v acetonitrile:water (B) with 10mM ammonium formate and 0.125% formic acid for both ionization modes. A nonlinear gradient was run for 17 minutes at a constant flow rate of 0.4 mL/min. starting at 100% B 0-7.7 minutes, 70% B 7.7-9.5 minutes, 40% B 9.5-10.25 minutes, 30% B 10.25-12.75 minutes, and 100% B 12.75-17 minutes. The data acquisition parameters for both positive and negative ionization modes were: 45°C column chamber temperature, 45°C post-column cooler temperature, 45°C pre-heater temperature, 15-minute acquisition time, 60 to 900 m/z acquisition mass range, and stepped normalized collision energies of 20, 30, and 40%.

#### *Data processing and Statistics*

Deconvolution, peak picking, alignment, and identification for both lipidomics and HILIC data was completed in MS-DIAL v.4.18 (22). Identification for all compounds was based on mass spectra from *in silico* libraries, MassBank of North America (<https://massbank.us>), and NIST20. Experimental spectra from MassBank of North America are publicly available and NIST20 spectra are commercially available for use. Matches were determined based on m/z, retention time, and MS/MS fragmentation pattern (23). The processed data were normalized using Systematic Error Removal in Random Forest (SERRF) (24), a machine-learning algorithm that normalizes experimental samples based on systematic variation in pooled QC samples. Statistical analysis was completed in R v.3.6.1 on the log-transformed peak heights of each compound. One-way ANOVA was performed with Tukey's HSD post-hoc test to adjust for multiple comparisons. Multivariate statistical analysis was conducted by principal component analysis (PCA), hierarchical clustering analysis (HCA) and chemical similarity enrichment analysis (ChemRICH) (25). Volcano plots and heatmaps were generated in R using the Bioconductor packages EnhancedVolcano and ComplexHeatmap (26, 27).

476

477

**Table E1. Internal standards used in lipidomics analysis.**

**Internal Standard**

Cholesterol ester 22:1

Cholesterol-d7

CUDA

Diacylglycerol 12:0/12:0/0:0

Diacylglycerol 18:1/2:0/0:0

Lysophosphatidylcholine 17:0

Lysophosphatidylethanolamine 17:1

Monoacylglycerol 17:0/0:0/0:0

Phosphatidylcholine 12:0/13:0

Phosphatidylethanolamine 17:0/17:0

Sphingomyelin d18:1/17:0

Sphingosine d17:1

Triacylglycerol (14:0/16:1/14:0)-d5

Triacylglycerol d5 17:0/17:1/17:0

5-PAHSA-d9

Ceramide d18:1/17:0

Fatty acid 16:0-d3

Phosphatidylglycerol 17:0/17:0

Phosphatidylinositol (15:0-18:1)-d7

Phosphatidylserine (15:0-18:1)-d7

---

478



479  
480

**Table E2. Internal standards used in HILIC analysis.**

| Internal Standard       |
|-------------------------|
| D9-Choline              |
| D9-TMAO                 |
| D3-1-Methylnicotinamide |
| D9-Betaine              |
| D3-Acylcarnitine (2:0)  |
| D3-Histamine, N-methyl  |
| D9-Butyrobetaine        |
| D3-L-Carnitine          |
| D9-Crotonobetaine       |
| D7-Proline              |
| D3-Creatine             |
| D3-Aspartic Acid        |
| CUDA                    |
| D3-Creatinine           |
| D8-Tryptophan           |
| D8-Phenylalanine        |
| Val-Tyr-Val             |
| D10-Leucine             |
| D10-Isoleucine          |
| D8-Methionine           |
| D8-Valine               |
| D3-DL-Alanine           |
| D4-Alanine              |
| D5-Threonine            |
| D5-L-Glutamine          |
| D3-Serine               |
| D3-DL-Glutamic acid     |
| D5-Glutamic acid        |
| D3-DL-Aspartic acid     |

D5-Histidine

D7-Arginine

15N2-L-Arginine

D8-Lysine

D2-Ornithine

D4-Cystine

---

482  
483  
484

**Table E3. Metabolites significantly different between female mouse airways and parenchyma at 6 hours post-injection for each treatment group.**

| Metabolite Name                  | p-          |             | p-value     | Fold Change |       |
|----------------------------------|-------------|-------------|-------------|-------------|-------|
|                                  | value       | Fold Change |             |             |       |
|                                  | control     | control     | naphthalene | naphthalene |       |
| 1-Oleoyl-2-hydroxy-sn-glycero-3- |             |             |             |             |       |
| phospho-(1'-rac-glycerol)        | 0.002865292 | -0.46       | 0.996426153 | -0.16       |       |
| 1-Palmitoyl-2-myristoyl-sn-      |             |             |             |             |       |
| glycero-3-phosphocholine         | 0.013337944 | -0.31       | 0.691528066 | -0.17       |       |
| 3-Methyl-L-histidine             | 0.000140955 | 0.89        | 0.972265746 | 0.11        |       |
| Acetylcholine cation             | 0.048124479 | 0.95        | 0.000360566 | 1.89        |       |
| Ala-Val                          | 0.966512309 | 0.65        | 0.000121689 | 1.33        |       |
| Allantoin                        | 0.000932901 | -0.44       | 0.999995746 | -0.06       |       |
| Aprobarbital                     | 0.340399913 | -0.25       | 0.038368143 | -0.33       |       |
| BMP 34:2                         | 0.055692744 | -0.43       | 0.008054857 | -0.44       |       |
| BMP 40:7                         | 0.011618916 | -0.26       | 0.330585357 | -0.21       |       |
| BMP 40:8                         | 0.024146737 | -0.25       | 0.621304497 | -0.18       |       |
| CE 16:0                          |             | 1           | 0.00        | 5.44474E-05 | -3.85 |
| CE 18:1                          | 0.995675175 | -3.63       | 5.19679E-10 | -5.49       |       |
| CE 18:2                          | 0.002612082 | -1.58       | 0.015334513 | -1.63       |       |
| CE 18:3                          | 0.773308758 | -3.56       | 1.67307E-05 | -4.22       |       |
| CE 20:4                          | 0.017554678 | -1.20       | 0.546504664 | -0.73       |       |
| CE 20:5                          | 0.001305849 | -1.64       | 0.00023799  | -1.80       |       |
| CE 22:6                          | 0.001089895 | -0.75       | 0.13203369  | -1.01       |       |
| Cholesterol 3-sulfate            | 0.041682193 | -0.32       | 0.999888923 | -0.07       |       |
| delta-Dodecalactone              | 0.019245796 | -0.60       | 0.999999999 | 0.11        |       |
| D-Fructose                       |             | 1           | 0.00        | 0.000684922 | -0.35 |
| DG 32:0                          | 0.257664441 | -0.09       | 0.013515428 | -0.15       |       |
| DG 32:2                          | 0.273738749 | 0.41        | 0.042955494 | 0.58        |       |
| DG 34:3                          | 0.000300943 | 0.83        | 0.00030511  | 0.73        |       |
| DG 39:7                          | 4.56267E-06 | 2.26        | 1.71513E-05 | 1.97        |       |

D-Glucuronic acid gamma-

|                           |             |       |             |       |
|---------------------------|-------------|-------|-------------|-------|
| lactone                   | 2.67249E-06 | 0.54  | 0.999999812 | 0.00  |
| Galactinol                | 0.00776589  | 0.25  | 0.067228811 | 0.20  |
| gamma-Glutamylleucine     | 0.999531801 | -0.25 | 0.03505218  | 0.48  |
| Geranic acid              | 0.242777041 | -0.30 | 0.044962715 | -0.37 |
| Glucose-1-phosphate       | 0.025970655 | 0.34  | 8.42731E-06 | 0.69  |
| Guanosine                 | 0.002145748 | 0.91  | 0.996890875 | 0.20  |
| Hypoxanthine              | 3.98304E-06 | 0.58  | 0.999992596 | 0.02  |
| Inosine                   | 1.39821E-09 | 0.95  | 0.979259376 | 0.17  |
| Leu-Leu                   | 0.003572503 | 0.96  | 0.007871855 | 0.75  |
| LPC 14:0                  | 0.015499855 | -0.31 | 0.93340884  | -0.11 |
| LPC 15:0                  | 0.046220729 | -0.28 | 0.971601191 | -0.08 |
| LPC 16:0                  | 0.004723784 | -0.29 | 0.927149882 | -0.11 |
| LPC 16:1                  | 0.000401053 | -0.30 | 0.120312924 | -0.19 |
| Myristoyl-L-carnitine     | 0.014246976 | -0.39 | 0.99991439  | 0.10  |
| N-Acetyl-D-glucosamine 6- |             |       |             |       |
| phosphate                 | 0.884464086 | 0.14  | 2.7373E-09  | 0.64  |
| Oxypurinol                | 0.016852951 | 0.46  | 0.989706605 | -0.05 |
| Palmitelaidic acid        | 0.001906742 | -0.55 | 0.001368161 | -0.56 |
| PC 29:0                   | 0.001542476 | -0.32 | 0.157031451 | -0.22 |
| PC 30:0                   | 0.000118938 | -0.45 | 0.071660757 | -0.29 |
| PC 30:1                   | 6.08345E-05 | -0.35 | 0.078017904 | -0.22 |
| PC 31:0                   | 0.000710505 | -0.53 | 0.012036053 | -0.45 |
| PC 32:1                   | 0.000580518 | -0.36 | 0.110265402 | -0.23 |
| PC 32:2                   | 0.001973366 | -0.43 | 0.225803369 | -0.26 |
| PC 32:3                   | 9.29044E-05 | -0.41 | 0.059503022 | -0.25 |
| PC 33:0                   | 0.038060645 | -0.32 | 0.951089674 | -0.14 |
| PC 33:1                   | 0.006377712 | -0.43 | 0.181038023 | -0.31 |
| PC 34:2                   | 0.004840602 | -0.36 | 0.445195422 | -0.22 |
| PC 34:3                   | 0.000200915 | -0.35 | 0.287487268 | -0.19 |
| PC 34:4                   | 0.031022892 | -0.28 | 0.999999996 | -0.01 |

|                  |             |       |             |       |
|------------------|-------------|-------|-------------|-------|
| PC 38:7          | 0.017501837 | -0.19 | 0.113100568 | -0.15 |
| PC 40:6          | 0.068464009 | 0.37  | 6.4193E-05  | 0.55  |
| PC 40:8          | 0.083699289 | 0.28  | 0.008666827 | 0.33  |
| PC 42:5          | 0.999979336 | 0.08  | 0.041076127 | 0.47  |
| PE 40:8          | 0.498293819 | 0.26  | 0.041123373 | 0.35  |
| PG 30:0          | 0.102148315 | -0.32 | 0.043295443 | -0.33 |
| PG 32:0          | 0.022242489 | -0.36 | 0.152959184 | -0.23 |
| plasmeyl-PC 32:0 | 0.039372442 | -0.34 | 0.935754252 | -0.16 |
| Ser-Ala          | 0.99978355  | 0.06  | 0.000685024 | 0.40  |
| SM 34:0          | 0.003124591 | -0.48 | 0.479618018 | -0.28 |
| TG 40:0          | 0.001247526 | 1.94  | 1.83011E-06 | 4.98  |
| TG 40:1          | 1.93454E-05 | 1.94  | 7.63318E-08 | 6.17  |
| TG 42:1          | 0.014482008 | 1.60  | 4.03043E-06 | 2.44  |
| TG 42:2          | 0.001908077 | 1.82  | 2.50169E-07 | 5.89  |
| TG 42:3          | 2.4634E-11  | 2.67  | 2.01755E-11 | 5.74  |
| TG 44:0          | 6.97364E-10 | 1.41  | 2.15395E-11 | 1.79  |
| TG 46:0          | 1.24072E-05 | 1.27  | 2.72864E-07 | 1.71  |
| TG 46:1          | 2.04402E-11 | 1.55  | 2.11456E-11 | 1.58  |
| TG 46:2          | 2.56127E-10 | 1.29  | 1.99144E-11 | 1.86  |
| TG 46:3          | 0.115987257 | 1.70  | 1.13567E-07 | 6.17  |
| TG 46:4          | 1.11244E-06 | 2.32  | 1.57251E-08 | 5.24  |
| TG 46:5          | 4.63935E-05 | 4.82  | 0.060015005 | 4.31  |
| TG 47:0          | 0.0781798   | 1.06  | 0.003149501 | 1.58  |
| TG 47:2          | 0.006664093 | 2.18  | 0.000537228 | 2.54  |
| TG 48:1          | 2.08434E-11 | 1.37  | 2.06987E-11 | 1.44  |
| TG 48:2          | 2.07944E-11 | 1.18  | 1.99668E-11 | 1.36  |
| TG 48:3          | 2.45736E-11 | 1.31  | 1.99115E-11 | 1.68  |
| TG 48:4          | 0.076659018 | 1.57  | 5.16117E-07 | 2.43  |
| TG 48:5          | 2.20971E-08 | 2.40  | 7.07501E-09 | 5.12  |
| TG 49:2          | 1.60695E-08 | 0.78  | 3.37713E-11 | 1.01  |
| TG 49:3          | 1.99841E-05 | 1.54  | 7.80991E-10 | 2.09  |



|         |             |      |             |      |
|---------|-------------|------|-------------|------|
| TG 50:1 | 5.89468E-07 | 0.63 | 1.41651E-09 | 0.80 |
| TG 50:2 | 2.01307E-11 | 1.21 | 1.99373E-11 | 1.33 |
| TG 50:3 | 2.06172E-11 | 1.21 | 1.99939E-11 | 1.35 |
| TG 50:4 | 0.000236362 | 0.32 | 8.97573E-09 | 0.47 |
| TG 50:5 | 0.003101707 | 1.56 | 1.99943E-11 | 2.70 |
| TG 50:6 | 0.14246787  | 1.45 | 0.000210044 | 1.99 |
| TG 51:1 | 2.14172E-05 | 0.67 | 8.03209E-09 | 1.15 |
| TG 51:2 | 7.49019E-05 | 0.58 | 1.02629E-08 | 0.90 |
| TG 51:3 | 3.29116E-11 | 1.03 | 2.34129E-11 | 1.11 |
| TG 51:4 | 3.4929E-10  | 1.09 | 1.99335E-11 | 1.40 |
| TG 52:1 | 6.79916E-10 | 0.93 | 7.57617E-11 | 1.09 |
| TG 52:2 | 1.34451E-06 | 0.56 | 1.75124E-09 | 0.68 |
| TG 52:4 | 0.095945189 | 0.16 | 0.042220996 | 0.17 |
| TG 52:5 | 9.57749E-10 | 1.02 | 3.95177E-11 | 1.18 |
| TG 52:7 | 0.097389547 | 1.33 | 0.000395939 | 1.41 |
| TG 53:1 | 0.360374071 | 0.39 | 0.000314916 | 1.06 |
| TG 53:2 | 8.61395E-07 | 0.52 | 6.93862E-08 | 0.63 |
| TG 53:3 | 3.56761E-10 | 0.80 | 2.66013E-11 | 0.93 |
| TG 53:4 | 3.43316E-06 | 0.96 | 2.93925E-06 | 0.98 |
| TG 53:5 | 8.6223E-09  | 1.03 | 1.41691E-10 | 1.11 |
| TG 53:6 | 0.00972297  | 1.12 | 0.483306851 | 0.96 |
| TG 54:1 | 0.428176968 | 0.46 | 0.021036158 | 1.17 |
| TG 54:2 | 7.29493E-09 | 0.93 | 1.63666E-07 | 0.83 |
| TG 54:3 | 3.62551E-11 | 1.12 | 2.6476E-11  | 1.13 |
| TG 54:4 | 2.00783E-11 | 1.02 | 1.99428E-11 | 1.05 |
| TG 54:5 | 3.34861E-10 | 1.37 | 7.31938E-09 | 1.12 |
| TG 54:7 | 7.43439E-07 | 0.97 | 4.58079E-07 | 0.77 |
| TG 54:8 | 0.062599768 | 0.85 | 0.001439953 | 1.26 |
| TG 55:3 | 0.567568771 | 0.21 | 1.93473E-05 | 0.71 |
| TG 56:3 | 3.47362E-06 | 0.68 | 0.000384642 | 0.56 |
| TG 56:4 | 4.15595E-06 | 0.56 | 1.24214E-09 | 0.74 |

|          |             |       |             |      |
|----------|-------------|-------|-------------|------|
| TG 56:5  | 3.38323E-09 | 0.86  | 1.57769E-09 | 0.92 |
| TG 56:8  | 0.999946084 | -0.05 | 0.036568258 | 0.28 |
| TG 58:10 | 0.979197506 | 0.05  | 0.02724518  | 0.14 |
| TG 58:9  | 0.999916243 | 0.05  | 0.000224976 | 0.37 |
| TG 60:3  | 0.019929945 | 0.52  | 0.973439538 | 0.19 |
| TG 66:2  | 0.007548282 | 1.89  | 0.000679626 | 4.67 |
| TG 66:3  | 0.026333102 | 5.61  | 0.061845772 | 4.27 |
| Uridine  | 1           | -0.02 | 0.003319466 | 0.34 |

---

485  
486

487  
488

**Table E4. Metabolites significantly different between naphthalene- and control- treated female mice at 6 hours post-injection for each tissue.**

| Metabolite Name                                           | p-value     | Fold change | p-value     | Fold Change |
|-----------------------------------------------------------|-------------|-------------|-------------|-------------|
|                                                           | airways     | airways     | parenchyma  | parenchyma  |
| 12-oxo-ETE                                                | 0.883353626 | -0.31       | 0.002363285 | -1.43       |
| 13,14-Dihydro-15-ketoprostaglandin A2                     | 0.02533179  | -1.35       | 5.02983E-05 | -1.59       |
| 13-Keto-9Z,11E-octadecadienoic acid                       | 0.090515024 | -1.44       | 0.000396236 | -1.62       |
| 14-HDoHE                                                  | 0.121186491 | -1.31       | 0.000112629 | -2.11       |
| 1-Oleoyl-2-hydroxy-sn-glycero-3-phospho-(1'-rac-glycerol) | 0.039611354 | 1.36        | 1           | 0.36        |
| 3-Methyl-L-histidine                                      | 0.14926271  | 1.48        | 2.93419E-07 | 4.06        |
| 8-Oxo-2-deoxyadenosine                                    | 0.017489747 | 1.81        | 0.000281334 | 2.57        |
| 9-Oxo-10(E),12(E)-octadecadienoic acid                    | 0.957582444 | -0.78       | 0.030457479 | -1.27       |
| Acetylenedicarboxylic acid                                | 0.018277584 | -0.50       | 0.025543071 | -0.51       |
| Adenosine 5'-diphosphoribose                              | 2.05348E-06 | 8.28        | 0.001522438 | 5.86        |
| Adenosine 5'-monophosphate                                | 0.639454573 | 2.09        | 0.02709777  | 3.50        |
| Ala-Ala                                                   | 0.503097621 | -2.03       | 0.018257852 | -2.36       |
| Ala-Lys                                                   | 1.40258E-07 | -3.86       | 1.58163E-06 | -5.88       |
| Alanine                                                   | 0.003025151 | -2.59       | 0.000146798 | -2.87       |
| Ala-Pro                                                   | 3.3395E-11  | -5.74       | 1.99586E-11 | -6.74       |
| Ala-Thr                                                   | 0.001062654 | -2.22       | 0.017263127 | -1.96       |
| Ala-Val                                                   | 0.069621108 | -3.58       | 8.21715E-08 | -5.84       |
| Allantoin                                                 | 1           | -0.11       | 0.003197828 | -1.39       |
| Arginine                                                  | 5.09689E-07 | -3.32       | 2.95778E-07 | -3.12       |
| Arg-Thr                                                   | 0.84548275  | -3.25       | 0.016892245 | -3.66       |
| Asp-Arg                                                   | 0.032637624 | -14.45      | 0.188557985 | -4.81       |
| Bestatin                                                  | 1.63778E-08 | -3.01       | 3.21815E-06 | -2.38       |
| beta-Homoproline                                          | 0.006729921 | 2.08        | 0.010513068 | 2.41        |
| Bicyclo-prostaglandin E2                                  | 0.999894693 | -0.30       | 0.002483754 | -1.48       |
| CE 16:0                                                   | 1           | 0.00        | 5.54094E-05 | 12.78       |
| CE 18:1                                                   | 1           | 0.05        | 2.80136E-08 | 6.23        |
| CE 18:3                                                   | 1           | 0.01        | 0.010996891 | 2.19        |

|                                           |             |       |             |        |
|-------------------------------------------|-------------|-------|-------------|--------|
| Choline                                   | 0.048190857 | -1.33 | 0.33843499  | -0.72  |
| Cystine                                   | 0.00012837  | -3.23 | 9.58729E-08 | -4.41  |
| Cytarabine                                | 0.006506357 | -2.22 | 0.000270123 | -2.16  |
| Cytidine 2',3'-cyclic monophosphoric acid | 8.42805E-05 | -2.48 | 0.000154453 | -2.15  |
| Cytidine 5'-diphosphate ethanolamine      | 2.0829E-11  | 14.73 | 2.16577E-11 | 9.19   |
| Cytidine-5'-monophosphate                 | 0.002898603 | 2.12  | 0.0826784   | 1.65   |
| D-Fructose                                | 0.000629415 | -1.16 | 1           | 0.01   |
| DG 30:0                                   | 0.400115113 | -0.94 | 3.65742E-06 | -1.70  |
| DG 31:0                                   | 0.126348157 | -0.71 | 0.033035123 | -0.78  |
| DG 32:1                                   | 0.069724226 | -0.67 | 0.014667333 | -0.71  |
| DG 33:1                                   | 0.969600963 | -0.42 | 0.02145158  | -0.81  |
| DG 36:1                                   | 0.879884221 | -0.37 | 0.007663538 | -0.73  |
| DG 38:5                                   | 0.77550267  | -0.38 | 0.001673593 | -0.81  |
| D-Glucuronic acid gamma-lactone           | 0.997696339 | -0.39 | 0.000412155 | 1.40   |
| FA 16:1                                   | 0.019187031 | -1.55 | 0.209728183 | -0.91  |
| FA 18:2                                   | 0.017206422 | -1.64 | 0.13743199  | -1.06  |
| FA 20:2                                   | 0.15849512  | -1.15 | 0.022986149 | -1.29  |
| GlcCer 42:1                               | 0.999991014 | -0.16 | 0.009111821 | 1.01   |
| Gln-Ala                                   | 0.000146926 | -6.01 | 0.090746918 | -1.90  |
| Gln-Thr                                   | 0.000501143 | -1.82 | 0.008447503 | -1.55  |
| Glu-Gly-Arg                               | 0.274534277 | -4.35 | 0.003388058 | -4.85  |
| Glu-Thr                                   | 3.4537E-08  | -5.70 | 1.77168E-05 | -4.59  |
| Gly-Lys                                   | 3.51156E-05 | -6.11 | 0.001989254 | -5.35  |
| Gly-Ser                                   | 0.017648568 | -3.54 | 3.63364E-05 | -4.32  |
| Gly-Tyr                                   | 0.000460656 | -1.93 | 1.28658E-05 | -2.15  |
| Guanosine                                 | 0.999614596 | 0.45  | 0.004232542 | 2.81   |
| Guanosine-5'-monophosphate                | 0.047608097 | 1.16  | 0.288064244 | 0.97   |
| His-Gln                                   | 0.006324604 | -4.75 | 0.024165713 | -3.09  |
| His-Leu                                   | 0.048140267 | -4.94 | 4.21509E-05 | -3.04  |
| His-Thr                                   | 4.00206E-05 | -6.05 | 3.02748E-06 | -16.51 |
| Histidine                                 | 0.018256264 | -2.26 | 0.005165274 | -2.60  |

|                                           |             |        |             |        |
|-------------------------------------------|-------------|--------|-------------|--------|
| Hypoxanthine                              | 0.999954759 | -0.26  | 0.000324069 | 1.60   |
| Ile-Arg                                   | 0.013341516 | -4.57  | 0.021465788 | -12.53 |
| Indole-3-carboxylic acid                  | 0.0005769   | -1.81  | 0.008826388 | -1.71  |
| Inosine                                   | 1           | 0.07   | 2.58703E-07 | 2.67   |
| LPC 17:1                                  | 0.146956869 | -11.90 | 0.006443851 | -6.40  |
| LPC 20:0                                  | 0.971931845 | -0.38  | 0.028582468 | -1.04  |
| LPC 20:1                                  | 0.198362972 | -1.10  | 0.002538803 | -1.64  |
| LPC 22:4                                  | 0.00627216  | -11.67 | 0.166093405 | -3.60  |
| LPC 22:6                                  | 5.21716E-07 | -1.73  | 8.48566E-06 | -1.65  |
| LPC 14:0                                  | 0.592062487 | -0.63  | 0.002019848 | -1.29  |
| LPC 16:1                                  | 6.86109E-06 | -1.28  | 4.5679E-09  | -1.63  |
| LPC 18:0                                  | 0.997529992 | -0.27  | 0.035032057 | -0.84  |
| LPC 18:1                                  | 0.001695943 | -1.11  | 3.93357E-05 | -1.30  |
| LPC 18:2                                  | 5.4053E-06  | -1.28  | 9.20417E-08 | -1.50  |
| LPC 20:3                                  | 0.005601261 | -2.55  | 0.096249617 | -2.38  |
| LPC 20:4                                  | 5.41734E-06 | -1.28  | 8.4647E-09  | -1.87  |
| LPC 22:5                                  | 0.000538268 | -3.30  | 0.097483766 | -3.05  |
| Lys-Ala                                   | 7.7306E-07  | -4.48  | 3.20427E-09 | -5.34  |
| Lys-Gln                                   | 0.000780483 | -6.96  | 9.97485E-06 | -15.90 |
| Lysine                                    | 1.54712E-05 | -4.19  | 6.5609E-07  | -4.44  |
| Lys-Pro                                   | 2.73201E-10 | -18.78 | 2.43399E-09 | -9.25  |
| Lys-Val                                   | 0.1683592   | -1.81  | 0.000477647 | -6.05  |
| Methionine                                | 2.29999E-06 | -2.91  | 1.06666E-05 | -2.50  |
| Myristoyl-L-carnitine                     | 0.99999193  | -0.27  | 0.000236862 | -1.89  |
| N-Acetyl-D-glucosamine 6-phosphate        | 0.995571274 | -0.28  | 2.78961E-08 | -1.96  |
| N-alpha-(tert-Butoxycarbonyl)-L-histidine | 0.007243105 | -2.17  | 0.018113467 | -2.24  |
| N-epsilon-Acetyllysine                    | 1.90843E-06 | -9.20  | 5.08125E-05 | -8.47  |
| N-Methyl-L-proline                        | 1.46539E-05 | -4.14  | 1.14025E-06 | -4.32  |
| Ornithine                                 | 0.072118775 | -1.80  | 0.010794639 | -2.93  |
| Palmitic acid                             | 0.001535523 | 1.12   | 0.133955178 | 0.78   |
| PC 25:0                                   | 0.999999598 | 0.31   | 0.031406369 | 1.27   |



|                           |             |        |             |        |
|---------------------------|-------------|--------|-------------|--------|
| PC 38:6                   | 0.131912639 | -0.41  | 0.028446805 | -0.49  |
| PE 40:4                   | 0.800133419 | -0.42  | 0.011214684 | -0.83  |
| Phenylalanine             | 3.52411E-08 | -3.02  | 3.84051E-06 | -2.39  |
| Pro-Leu                   | 0.041242594 | -3.72  | 0.000332358 | -3.31  |
| Proline                   | 4.89776E-05 | -2.82  | 2.03357E-07 | -3.53  |
| Pro-Pro                   | 0.000114928 | -4.81  | 0.001967272 | -5.19  |
| rac-Glycerol 3-phosphoate | 0.037214872 | -0.93  | 0.015981848 | -0.89  |
| Riboflavin                | 8.32671E-09 | -17.47 | 7.76424E-08 | -16.14 |
| Ribulose 5-phosphate      | 0.15035441  | -2.78  | 0.047482959 | -3.43  |
| Ser-Asn                   | 0.033939663 | -4.52  | 0.004504892 | -4.53  |
| Ser-Glu                   | 0.446668654 | -0.97  | 0.022448285 | -1.10  |
| Serine                    | 8.04009E-05 | -2.17  | 0.000137416 | -2.30  |
| Ser-Lys                   | 1.61517E-08 | -6.83  | 2.86041E-08 | -6.92  |
| Ser-Pro                   | 0.006875018 | -3.89  | 2.40476E-09 | -5.76  |
| Ser-Thr                   | 0.043487012 | -5.18  | 0.111902282 | -3.76  |
| Ser-Val                   | 7.49765E-05 | -15.39 | 0.097994985 | -12.28 |
| SM 32:1                   | 0.794390434 | -0.40  | 0.001406002 | -0.89  |
| TG 46:2                   | 0.999072872 | -0.41  | 0.003540875 | -2.30  |
| TG 46:3                   | 1           | -0.50  | 0.004496577 | -15.35 |
| TG 48:3                   | 0.994367639 | -0.42  | 0.033896396 | -1.64  |
| TG 48:4                   | 0.999999999 | -0.62  | 0.021626578 | -3.47  |
| TG 50:4                   | 0.991192038 | -0.25  | 0.016047761 | -0.75  |
| TG 50:5                   | 0.999998247 | -0.56  | 1.12936E-07 | -4.36  |
| TG 51:4                   | 0.99986825  | -0.25  | 0.020804687 | -1.29  |
| TG 56:7                   | 1           | 0.05   | 0.034901515 | -0.71  |
| TG 56:8                   | 0.999999648 | -0.03  | 0.00136058  | -1.11  |
| TG 56:9                   | 0.99999997  | 0.01   | 0.026855358 | -0.63  |
| TG 60:11                  | 0.001163844 | 0.80   | 0.008279034 | 0.69   |
| TG 60:12                  | 4.2112E-05  | 1.03   | 0.024401089 | 0.71   |
| Thiamine cation           | 3.15056E-05 | -6.69  | 3.89475E-07 | -6.37  |
| Thr-Ala                   | 7.64777E-05 | -6.60  | 0.011193507 | -4.28  |

|                                      |             |       |             |       |
|--------------------------------------|-------------|-------|-------------|-------|
| Threonine                            | 0.002598595 | -1.96 | 1.078E-05   | -2.58 |
| Thr-Lys                              | 3.8716E-09  | -5.96 | 4.84662E-05 | -5.72 |
| Uridine                              | 0.00244635  | -1.28 | 1.39152E-10 | -2.48 |
| Uridine 5'-monophosphate             | 0.005959534 | 1.65  | 0.192569005 | 1.16  |
| Uridine diphosphate galactose        | 1.76582E-05 | 6.18  | 0.030821525 | 5.05  |
| Uridine-5-diphosphoacetylglucosamine | 1.21668E-09 | 4.77  | 5.11274E-07 | 4.26  |
| Val-Thr                              | 0.000728176 | -2.40 | 0.026546975 | -1.81 |
| Xanthosine                           | 5.78725E-07 | -3.44 | 2.21857E-11 | -4.86 |

---

490 **Figure E1. Scree plot indicating the percent of variance contained within the first 10 principal components.** The  
491 percent of variance contained within the first 5 principal components is less than 50% of the total variance explained by  
492 PCA. Each bar represents a different dimension, where dimension 1 corresponds to the first principal component.  
493

494 **Figure E2. Metabolite profiles of lung airways and parenchyma are greatly altered following naphthalene**  
495 **treatment in males 2 hours post-injection. A-B)** ChemRICH plots comparing naphthalene-treated airways and  
496 parenchyma in male mice 2 hours post-injection, respectively. The size of each circle represents the relative number of  
497 metabolites contained within each cluster. Red circles indicate all metabolites increase within a cluster, while blue circles  
498 indicate all metabolites decrease within a cluster. Pink and purple circles represent a mix consisting of mostly increased  
499 and decreased metabolite abundances, respectively. Axes correspond to the  $-\log P$  value of a metabolite class plotted  
500 against index values assigned to each metabolite in the online datasheet included as supplemental material. P-values  
501 used for the input of each ChemRICH were calculated by one-way ANOVA with Tukey's post-hoc analysis. P-values for  
502 each ChemRICH cluster were calculated using the Kolmogorov-Smirnov test.  
503

504 **Figure E3. Metabolite profiles of lung airways and parenchyma are greatly altered following naphthalene**  
505 **treatment in females 2 hours post-injection. A-B)** ChemRICH plots comparing naphthalene-treated airways and  
506 parenchyma in female mice 2 hours post-injection, respectively. The size of each circle represents the relative number of  
507 metabolites contained within each cluster. Red circles indicate all metabolites increase within a cluster, while blue circles  
508 indicate all metabolites decrease within a cluster. Pink and purple circles represent a mix consisting of mostly increased  
509 and decreased metabolite abundances, respectively. Axes correspond to the  $-\log P$  value of a metabolite class plotted  
510 against index values assigned to each metabolite in the online datasheet included as supplemental material. P-values  
511 used for the input of each ChemRICH were calculated by one-way ANOVA with Tukey's post-hoc analysis. P-values for  
512 each ChemRICH cluster were calculated using the Kolmogorov-Smirnov test.  
513

514  
515 **Figure E4. Triacylglyceride abundance does not fluctuate between different timepoints for both female and male**  
516 **mice. A-B)** Boxplots displaying the average intensities for saturated and unsaturated TGs in female and male mice at  
517 each timepoint, respectively. Axes represent the  $\log_{10}$  peak height of each sample for each timepoint, and samples with  
518 values greater than 1.5 times the interquartile range are indicated by dots on each plot. \*  $p < 0.05$ , \*\*\*  $p < 0.001$ .  
519

520  
521

Figure E1

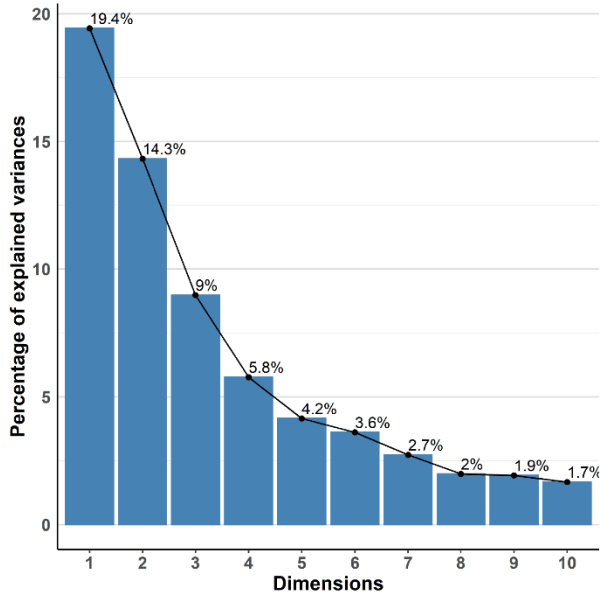

522  
523  
524

Figure E2

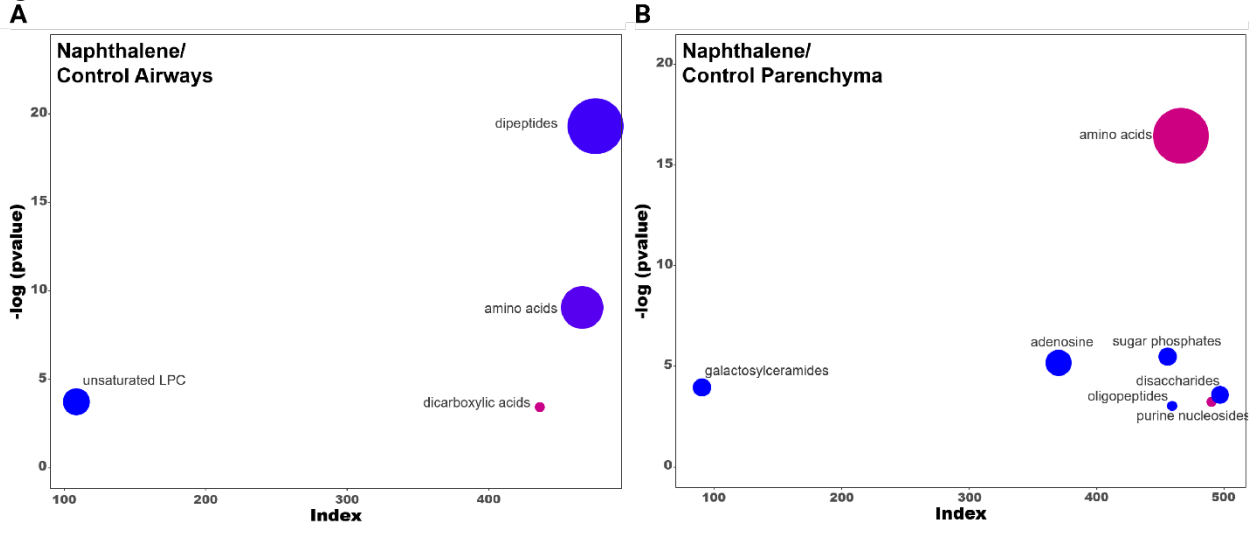

525  
526  
527

Figure E3

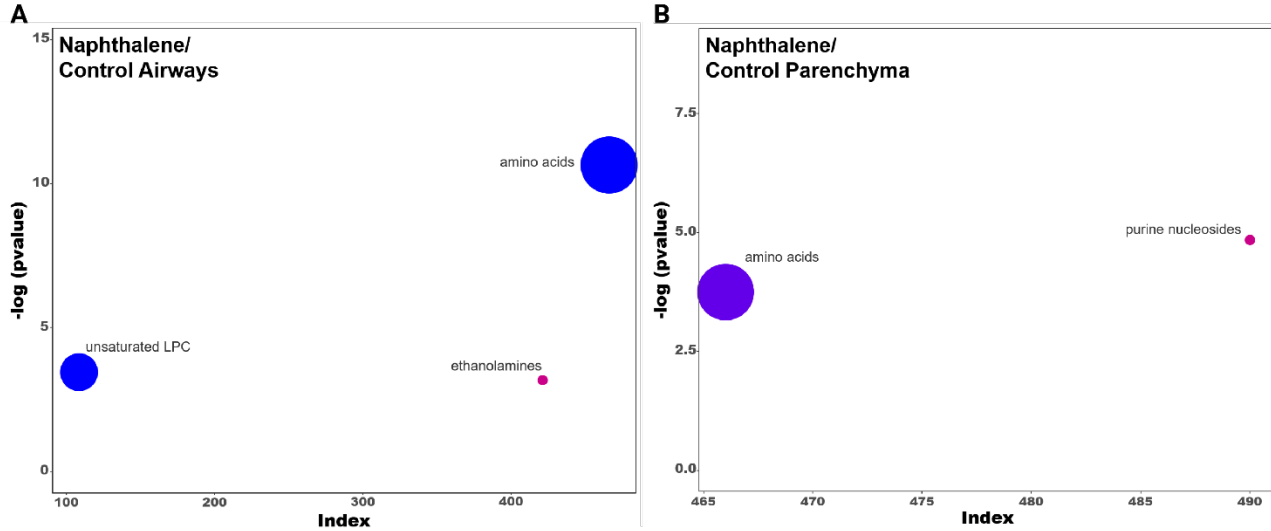

528  
529

530

## Figure E4

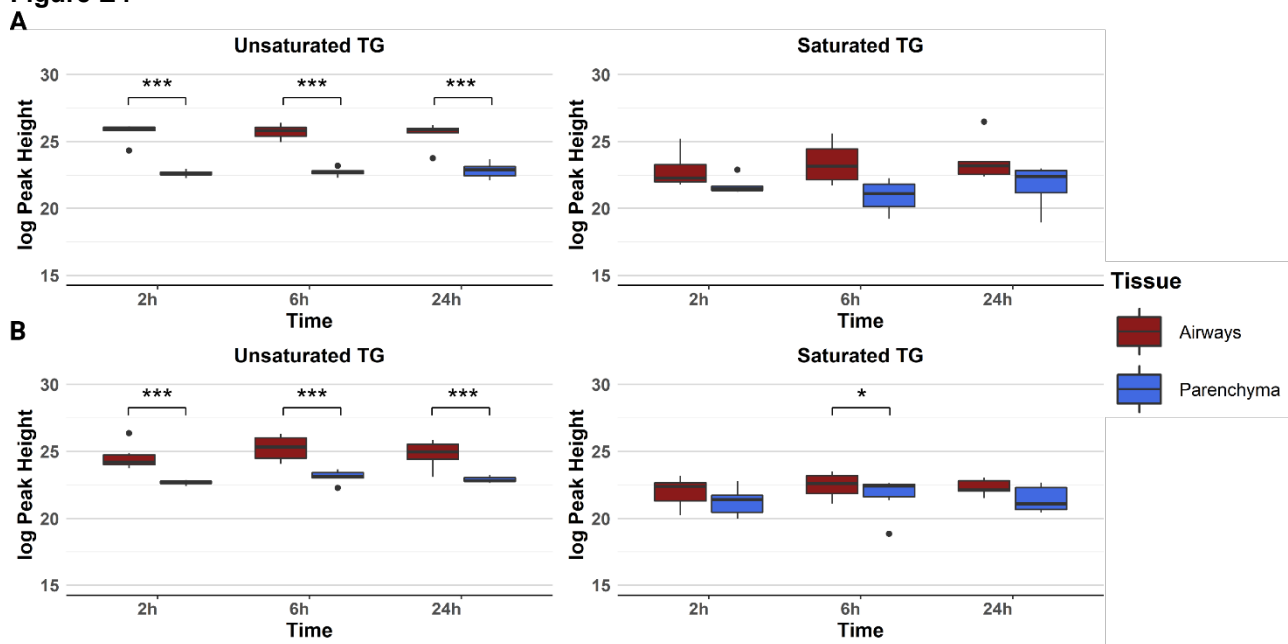

531
